# Supplementary material for: Retracted Article: Convenient synthesis of pyrimidine 2′-deoxyribonucleoside monophosphates with important epigenetic marks at the 5-position
Source: Royal Society of Chemistry journal article supplement (doi:10.1039/d0ob00884b), 2020-01-01
Supplement: d0ob00884b1.pdf [file d0ob00884b1.pdf]

## Supporting Information

### **Convenient Synthesis of Pyrimidine 2'-Deoxyribonucleoside Monophosphates with Important Epigenetic Marks at the 5-Position**

Song Zheng<sup>†</sup>, Ai Tran<sup>†</sup>, Alyson M. Curry<sup>‡</sup>, Dawanna S. White<sup>‡</sup>, Yana Cen<sup>†, #, \*</sup>

<sup>†</sup>*Department of Pharmaceutical Sciences, Albany College of Pharmacy and Health Sciences,  
Colchester, VT 05446*

<sup>‡</sup>*Department of Medicinal Chemistry, Virginia Commonwealth University, Richmond, VA 23219*

<sup>#</sup>*Institute for Structural Biology, Drug Discovery and Development, Virginia Commonwealth  
University, Richmond, VA 23219*

\*Correspondence: [ceny2@vcu.edu](mailto:ceny2@vcu.edu), phone: 804-828-7405

**Synthesis of 5'-O-(4,4'-dimethoxytrityl)-5-formyl-2'-deoxyuridine-3'-O-(2-cyanoethyl-*N,N*-diisopropyl)phosphoramidite and 5'-O-(4,4'-dimethoxytrityl)-5-methoxycarbonyl-2'-deoxyuridine-3'-O-(2-cyanoethyl-*N,N*-diisopropyl)phosphoramidite.**

*Synthesis of 5-formyl-2'-deoxyuridine.*

Place 3',5'-O-di-*t*-butylsilyl-5-formyl-2'-deoxyuridine<sup>1</sup> (190 mg, 0.48 mmol) in a 50 mL polypropylene tube. Add 8 mL of anhydrous THF followed by HF-pyridine (12  $\mu$ L, 0.48 mmol) under argon atmosphere. The mixture was stirred at room temperature for 1 h before 4 g of silica gel was added. Solvent was evaporated under reduced pressure to afford a silica gel mixed residue. Crude product was purified by column chromatography (CH<sub>2</sub>Cl<sub>2</sub> with 6% to 12% methanol) to afford 5-formyl-2'-deoxyuridine<sup>1</sup> (100 mg, 0.39 mmol, 81% yield) as a white solid. <sup>1</sup>H NMR (300 MHz, DMSO)  $\delta$ : 9.76 (s, 1H), 8.71 (s, 1H), 6.09, (t, *J* = 6.3 Hz, 1H), 5.27 (br, 1H), 5.11 (br, 1H), 4.23 (dd, *J* = 4.2, 8.9 Hz, 1H), 3.85 (dd, *J* = 3.5, 6.9 Hz, 1H), 3.62 (m, 2H), 2.21 (m, 2H). HRMS (*m/z*): calculated for C<sub>10</sub>H<sub>13</sub>N<sub>2</sub>O<sub>6</sub> (M+H): 257.0768; found: 257.0772. The <sup>1</sup>H NMR spectrum of 5-formyl-2'-deoxyuridine is consistent with CAS 4494-26-2.<sup>1</sup>

*Synthesis of 5'-O-(4,4'-dimethoxytrityl)-5-formyl-2'-deoxyuridine.*

To a solution of 5-formyl-2'-deoxyuridine (60 mg, 0.23 mmol) in 3 mL of anhydrous pyridine was added 4,4'-dimethoxytrityl chloride (119 mg, 0.35 mmol) under argon atmosphere. The mixture was stirred overnight at room temperature before it was quenched with the addition of 0.5 mL of methanol. Solvent was evaporated under reduced pressure. The residue was redissolved in CH<sub>2</sub>Cl<sub>2</sub>, washed with 5% NaHCO<sub>3</sub>, water, brine and dried over anhydrous Na<sub>2</sub>SO<sub>4</sub>. Solvent was removed *in vacuo*, crude product was purified by column chromatography (CH<sub>2</sub>Cl<sub>2</sub> with 2.5% methanol) to afford 5'-O-(4,4'-dimethoxytrityl)-5-formyl-2'-deoxyuridine (115 mg, 0.21 mmol, 90% yield) as a white foam. <sup>1</sup>H NMR (300 MHz, CDCl<sub>3</sub>)  $\delta$ : 9.65 (s, 1H), 8.42 (s, 1H), 7.24 (m, 2H), 7.22 (m, 7H), 6.80 (dd, *J* = 0.84, 9 Hz, 4H), 6.15 (t, *J* = 6.6 Hz, 1H), 4.42 (m, 1H), 4.10 (m, 1H), 3.73

(s, 6H), 3.38 (m, 2H), 2.59 (m, 1H), 2.25 (m, 1H).  $^{13}\text{C}$  NMR (75 MHz,  $\text{CDCl}_3$ )  $\delta$ : 185.3, 161.6, 158.6, 149.3, 145.8, 144.3, 135.4, 135.3, 130.0, 127.9, 127.0, 113.3, 111.1, 87.06, 87.00, 86.8, 72.4, 63.4, 55.2, 41.5. HRMS ( $m/z$ ): calculated for  $\text{C}_{31}\text{H}_{31}\text{N}_2\text{O}_8$  ( $\text{M}+\text{H}$ ): 559.2075; found: 559.2078. The  $^1\text{H}$  and  $^{13}\text{C}$  NMR spectra of 5'-O-(4,4'-dimethoxytrityl)-5-formyl-2'-deoxyuridine are consistent with CAS 157022-75-8.<sup>2</sup>

*Synthesis of 5'-O-(4,4'-dimethoxytrityl)-5-formyl-2'-deoxyuridine-3'-O-(2-cyanoethyl-N,N-diisopropyl)phosphoramidite.*

To a solution of 5'-O-(4,4'-dimethoxytrityl)-5-formyl-2'-deoxyuridine (40 mg, 0.072 mmol) in 1 mL of anhydrous  $\text{CH}_3\text{CN}$  were added diisopropylethylamine (28 mg, 0.215 mmol), tetrazole in  $\text{CH}_3\text{CN}$  (0.24 mL, 0.108 mmol) and 2-cyanoethyl *N,N,N',N'*-tetraisopropylphosphordiamidite (33 mg, 0.108 mmol). The reaction was kept at room temperature and monitored by TLC. Ten minutes later, precipitate appeared. Upon completion, the reaction was quenched with the addition of 0.5 mL of absolute ethanol. Reaction was diluted with ethyl acetate with 1% triethylamine, washed with 5%  $\text{NaHCO}_3$ , water, brine, and dried over anhydrous  $\text{Na}_2\text{SO}_4$ . Solvent was removed under reduced pressure, crude product was purified by column chromatography ( $\text{CH}_2\text{Cl}_2$  with 2% methanol and 1% triethylamine) to afford 5'-O-(4,4'-dimethoxytrityl)-5-formyl-2'-deoxyuridine-3'-O-(2-cyanoethyl-*N,N*-diisopropyl)phosphoramidite (48 mg, 0.063 mmol, 88% yield) as a white foam.  $^1\text{H}$  NMR (300 MHz,  $\text{CDCl}_3$ )  $\delta$ : 9.64 (d,  $J = 3.34$  Hz, 1H), 8.46 (s, 0.53H), 8.42 (s, 0.47H), 7.99 (s, 1H), 7.21 (m, 10H), 6.81 (m, 4H), 6.14 (m, 1H), 5.86 (s, 1H), 4.49 (m, 1H), 4.15 (m, 1H), 3.76 (s, 6H), 3.61 (m, 8H), 2.72 (m, 2H), 2.58 (m, 1H), 2.42 (m, 1H), 1.23 (m, 12H).  $^{13}\text{C}$  NMR (75 MHz,  $\text{CD}_3\text{OD}$ )  $\delta$ : 187.5, 163.7, 160.4, 151.1, 149.0, 146.2, 137.1, 136.9, 131.53, 131.50, 129.4, 129.0, 128.1, 114.4, 112.2, 88.9, 88.8, 88.3, 72.7, 64.8, 55.9, 55.0, 41.7, 26.7, 26.4, 19.4, 19.0.  $^{31}\text{P}$  NMR (120 MHz,  $\text{CDCl}_3$ )  $\delta$ : 149.2, 148.8. HRMS ( $m/z$ ): calculated for  $\text{C}_{40}\text{H}_{48}\text{N}_4\text{O}_9\text{P}$  ( $\text{M}+\text{H}$ ): 759.3153; found: 759.3158. The  $^1\text{H}$  and  $^{13}\text{C}$  NMR spectra of 5'-O-(4,4'-dimethoxytrityl)-5-formyl-

2'-deoxyuridine-3'-O-(2-cyanoethyl-*N,N*-diisopropyl)phosphoramidite are consistent with CAS 181421-94-3.<sup>2</sup>

*Synthesis of 5-methoxycarbonyl-2'-deoxyuridine.*

To a solution of 5-iodo-2'-deoxyuridine (100 mg, 0.282 mmol) in 4 mL of anhydrous DMF were added triphenylphosphine (45 mg, 0.17 mmol), triethylamine (57 mg, 0.566 mmol), Pd<sub>2</sub>(dba)<sub>3</sub> (26 mg, 0.028 mmol) and 0.5 mL of methanol. The reaction flask was vacuum-flushed with carbon monoxide for three times. The reaction was then allowed to proceed at 70°C under CO atmosphere overnight. Reaction was filtered, filtrate was concentrated and purified by column chromatography (CH<sub>2</sub>Cl<sub>2</sub> with 10% methanol) to afford 5-methoxycarbonyl-2'-deoxyuridine<sup>3</sup> (79 mg, 0.276 mmol, 98% yield) as a pale yellow oil. <sup>1</sup>H NMR (300 MHz, DMSO) δ: 8.81 (s, 1H), 6.08 (t, *J* = 6.3 Hz, 1H), 5.23 (br, 1H), 5.03 (br, 1H), 4.23 (m, 1H), 3.83 (m, 1H), 3.68 (s, 3H), 3.58 (m, 2H), 2.20 (m, 2H). HRMS (*m/z*): calculated for C<sub>11</sub>H<sub>15</sub>N<sub>2</sub>O<sub>7</sub> (M+H): 287.0874; found: 287.0871. The <sup>1</sup>H NMR spectrum of 5-methoxycarbonyl-2'-deoxyuridine is consistent with CAS 158021-27-3.<sup>3</sup>

*Synthesis of 5'-O-(4,4'-dimethoxytrityl)-5-methoxycarbonyl-2'-deoxyuridine.*

To a solution of 5-methoxycarbonyl-2'-deoxyuridine (250 mg, 0.874 mmol) in 20 mL of anhydrous pyridine was added 4,4'-dimethoxytrityl chloride (355 mg, 1.049 mmol) under argon atmosphere. The mixture was stirred overnight at room temperature before it was quenched with the addition of 1 mL of methanol. Solvent was evaporated under reduced pressure. The residue was redissolved in CH<sub>2</sub>Cl<sub>2</sub>, washed with 5% NaHCO<sub>3</sub>, water, brine and dried over anhydrous Na<sub>2</sub>SO<sub>4</sub>. Solvent was removed *in vacuo*, crude product was purified by column chromatography (CH<sub>2</sub>Cl<sub>2</sub> with 3% methanol) to afford 5'-O-(4,4'-dimethoxytrityl)-5-methoxycarbonyl-2'-deoxyuridine<sup>4</sup> (450 mg, 0.765 mmol, 88% yield) as a white foam. <sup>1</sup>H NMR (300 MHz, CD<sub>3</sub>COCD<sub>3</sub>) δ: 8.61 (s, 1H),

7.51 (m, 2H), 7.31 (m, 7H), 6.88 (m, 4H), 6.24 (t,  $J = 6.8$  Hz, 1H), 4.47 (m, 1H), 4.11 (m, 1H), 3.79 (s, 6H), 3.42 (dd,  $J = 3.3, 10.5$  Hz, 1H), 3.33 (dd,  $J = 4.3, 10.5$  Hz, 1H), 3.31 (s, 3H), 2.37 (m, 2H). HRMS ( $m/z$ ): calculated for  $C_{32}H_{33}N_2O_9$  ( $M+H$ ): 589.2181; found: 589.2189. The  $^1H$  NMR spectrum of 5'-O-(4,4'-dimethoxytrityl)-5-methoxycarbonyl-2'-deoxyuridine is consistent with CAS 158021-28-4.<sup>4</sup>

*Synthesis of 5'-O-(4,4'-dimethoxytrityl)-5-methoxycarbonyl-2'-deoxyuridine-3'-O-(2-cyanoethyl- $N,N$ -diisopropyl)phosphoramidite.*

To a solution of 5'-O-(4,4'-dimethoxytrityl)-5-methoxycarbonyl-2'-deoxyuridine (80 mg, 0.136 mmol) in 2 mL of anhydrous  $CH_3CN$  were added diisopropylethylamine (53 mg, 0.408 mmol), tetrazole in  $CH_3CN$  (0.45 mL, 0.204 mmol) and 2-cyanoethyl  $N,N,N',N'$ -tetraisopropylphosphordiamidite (61 mg, 0.204 mmol). The reaction was kept at room temperature and monitored by TLC. Ten minutes later, a white precipitate appeared. Upon completion, the reaction was quenched with the addition of 0.5 mL of absolute ethanol. Reaction was diluted with ethyl acetate with 1% triethylamine, washed with 5%  $NaHCO_3$ , water, brine, and dried over anhydrous  $Na_2SO_4$ . Solvent was removed under reduced pressure, crude product was purified by column chromatography ( $CH_2Cl_2$  with 1.5% methanol and 1% triethylamine) to afford 5'-O-(4,4'-dimethoxytrityl)-5-methoxycarbonyl-2'-deoxyuridine-3'-O-(2-cyanoethyl- $N,N$ -diisopropyl)phosphoramidite<sup>4</sup> (105 mg, 0.133 mmol, 98% yield) as a white foam.  $^1H$  NMR (300 MHz,  $CDCl_3$ )  $\delta$ : 8.69 (s, 0.52H), 8.65 (s, 0.48H), 7.39 (m, 2H), 7.23 (m, 7H), 6.79 (m, 4H), 6.22 (m, 1H), 4.48 (m, 1H), 4.20 (m, 1H), 3.74 (s, 6H), 3.54 (m, 5H), 3.21 (m, 1H), 3.18 (s, 1.5H), 3.17 (s, 1.5H), 2.72 (m, 2H), 2.57 (m, 1H), 2.22 (m, 1H), 1.23 (m, 12H).  $^{31}P$  NMR (120 MHz,  $CDCl_3$ )  $\delta$ : 149.2, 148.6. HRMS ( $m/z$ ): calculated for  $C_{41}H_{50}N_4O_{10}P$  ( $M+H$ ): 789.3259; found: 789.3264. The  $^1H$  NMR spectrum of 5'-O-(4,4'-dimethoxytrityl)-5-methoxycarbonyl-2'-deoxyuridine-3'-O-(2-cyanoethyl- $N,N$ -diisopropyl)phosphoramidite is consistent with CAS 158021-31-9.<sup>4</sup>

### 3'-dNMPs.

3'-<sup>ca</sup>dUMP <sup>1</sup>H NMR (300 MHz, D<sub>2</sub>O) δ: 8.45 (s, 1H), 6.35 (dd, *J* = 6.1, 7.4 Hz, 1H), 4.76 (m, 1H), 4.25 (m, 1H), 3.88 (m, 2H), 2.63 (m, 1H), 2.44 (m, 1H). <sup>31</sup>P NMR (120 MHz, D<sub>2</sub>O) δ: 2.5. HRMS (*m/z*): calculated for C<sub>10</sub>H<sub>12</sub>N<sub>2</sub>O<sub>10</sub>P (M-H): 351.0230; found: 351.0236.

3'-<sup>ca</sup>dCMP <sup>1</sup>H NMR (300 MHz, D<sub>2</sub>O) δ: 8.56 (s, 1H), 6.32 (dd, *J* = 6.1, 7.4 Hz, 1H), 4.78 (m, 1H), 4.29 (m, 1H), 3.88 (m, 2H), 2.67 (m, 1H), 2.36 (m, 1H). <sup>31</sup>P NMR (120 MHz, D<sub>2</sub>O) δ: 2.7. HRMS (*m/z*): calculated for C<sub>10</sub>H<sub>13</sub>N<sub>3</sub>O<sub>9</sub>P (M-H): 350.0389; found: 350.0390.

3'-<sup>hm</sup>dCMP <sup>1</sup>H NMR (300 MHz, D<sub>2</sub>O) δ: 7.92 (s, 1H), 6.29 (dd, *J* = 5.9, 8.0 Hz, 1H), 4.70 (m, 1H), 4.46 (s, 2H), 4.17 (m, 1H), 3.84 (m, 2H), 2.58 (m, 1H), 2.36 (m, 1H). <sup>31</sup>P NMR (120 MHz, D<sub>2</sub>O) δ: 1.1. HRMS (*m/z*): calculated for C<sub>10</sub>H<sub>15</sub>N<sub>3</sub>O<sub>8</sub>P (M-H): 336.0597; found: 336.0586.

3'-dCMP <sup>1</sup>H NMR (300 MHz, D<sub>2</sub>O) δ: 7.90 (d, *J* = 7.6 Hz, 1H), 6.34 (t, *J* = 6.9 Hz, 1H), 6.11 (d, *J* = 7.6 Hz, 1H), 4.76 (m, 1H), 4.25 (m, 1H), 3.87 (m, 2H), 2.63 (m, 1H), 2.39 (m, 1H). <sup>31</sup>P NMR (120 MHz, D<sub>2</sub>O) δ: 1.9. HRMS (*m/z*): calculated for C<sub>9</sub>H<sub>13</sub>N<sub>3</sub>O<sub>7</sub>P (M-H): 306.0491; found: 306.0490.

3'-dUMP <sup>1</sup>H NMR (300 MHz, D<sub>2</sub>O) δ: 7.87 (d, *J* = 8.1 Hz, 1H), 6.29 (t, *J* = 7.0 Hz, 1H), 5.90 (d, *J* = 8.1 Hz, 1H), 4.77 (m, 1H), 4.20 (m, 1H), 3.80 (m, 2H), 2.57 (m, 1H), 2.39 (m, 1H). <sup>31</sup>P NMR (120 MHz, D<sub>2</sub>O) δ: 1.1. HRMS (*m/z*): calculated for C<sub>9</sub>H<sub>12</sub>N<sub>2</sub>O<sub>8</sub>P (M-H): 307.0331; found: 307.0345.

3'-<sup>hm</sup>dUMP <sup>1</sup>H NMR (300 MHz, D<sub>2</sub>O) δ: 8.04 (s, 1H), 6.34 (dd, *J* = 6.1, 7.3 Hz, 1H), 4.75 (m, 1H), 4.49 (s, 2H), 4.37 (m, 1H), 4.10 (m, 2H), 2.60 (m, 1H), 2.37 (m, 1H). <sup>31</sup>P NMR (120 MHz, D<sub>2</sub>O) δ: 0.8. HRMS (*m/z*): calculated for C<sub>10</sub>H<sub>14</sub>N<sub>2</sub>O<sub>9</sub>P (M-H): 337.0437; found: 337.0444.

*3'-foUMP*  $^1\text{H}$  NMR (300 MHz,  $\text{D}_2\text{O}$ )  $\delta$ : 9.69 (s, 1H), 8.56 (s, 1H), 6.33 (dd,  $J = 6.0, 7.2$  Hz, 1H), 4.73 (m, 1H), 4.27 (m, 1H), 3.93 (m, 2H), 2.75 (m, 1H), 2.49 (m, 1H).  $^{31}\text{P}$  NMR (120 MHz,  $\text{D}_2\text{O}$ )  $\delta$ : 3.2. HRMS ( $m/z$ ): calculated for  $\text{C}_{10}\text{H}_{12}\text{N}_2\text{O}_9\text{P}$  (M-H): 335.0280; found: 335.0289.

*3'-mCMP*  $^1\text{H}$  NMR (300 MHz,  $\text{D}_2\text{O}$ )  $\delta$ : 7.68 (s, 1H), 6.30 (t,  $J = 6.8$  Hz, 1H), 4.73 (m, 1H), 4.18 (m, 1H), 3.85 (m, 2H), 2.57 (m, 1H), 2.33 (m, 1H), 1.97 (s, 3H).  $^{31}\text{P}$  NMR (120 MHz,  $\text{D}_2\text{O}$ )  $\delta$ : 1.0. HRMS ( $m/z$ ): calculated for  $\text{C}_{10}\text{H}_{15}\text{N}_3\text{O}_7\text{P}$  (M-H): 320.0648; found: 320.0643.

*3'-dTMP*  $^1\text{H}$  NMR (300 MHz,  $\text{D}_2\text{O}$ )  $\delta$ : 7.65 (s, 1H), 6.27 (t,  $J = 6.8$  Hz, 1H), 4.76 (m, 1H), 4.14 (m, 1H), 3.81 (m, 2H), 2.52 (m, 1H), 2.39 (m, 1H), 1.88 (s, 3H).  $^{31}\text{P}$  NMR (120 MHz,  $\text{D}_2\text{O}$ )  $\delta$ : 1.5. HRMS ( $m/z$ ): calculated for  $\text{C}_{10}\text{H}_{14}\text{N}_2\text{O}_8\text{P}$  (M-H): 321.0488; found: 321.0493.

*3'-foCMP*  $^1\text{H}$  NMR (300 MHz,  $\text{CD}_3\text{OD}$ )  $\delta$ : 9.58 (s, 1H), 9.06 (s, 1H), 6.24 (t,  $J = 5.9$  Hz, 1H), 4.44 (m, 1H), 4.06 (m, 1H), 3.96 (m, 1H), 3.84 (m, 1H), 2.56 (m, 1H), 2.31 (m, 1H).  $^{31}\text{P}$  NMR (120 MHz,  $\text{D}_2\text{O}$ )  $\delta$ : 2.3. HRMS ( $m/z$ ): calculated for  $\text{C}_{10}\text{H}_{13}\text{N}_3\text{O}_8\text{P}$  (M-H): 334.0440; found: 334.0424.

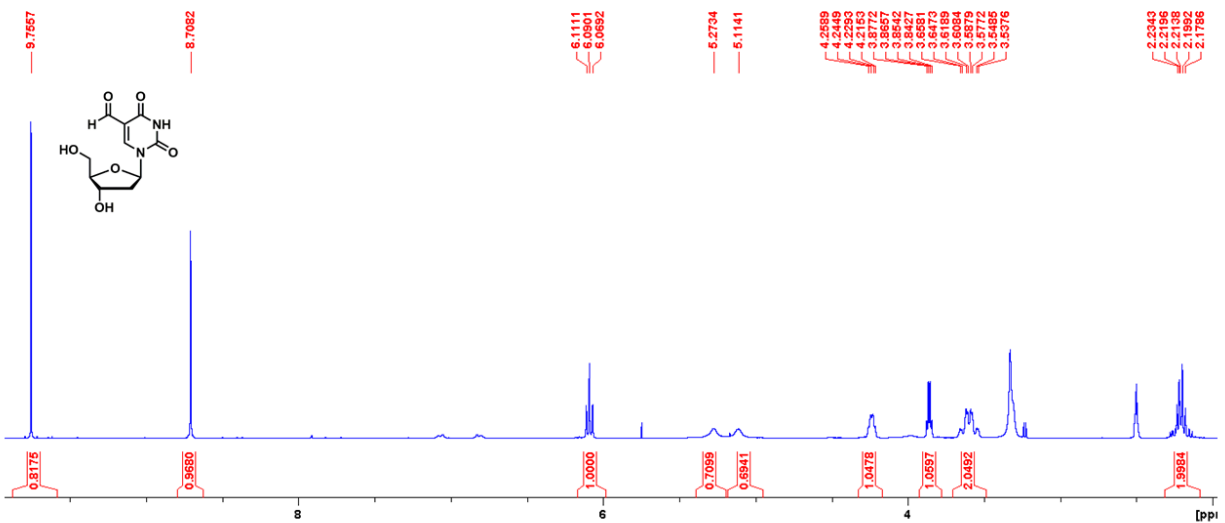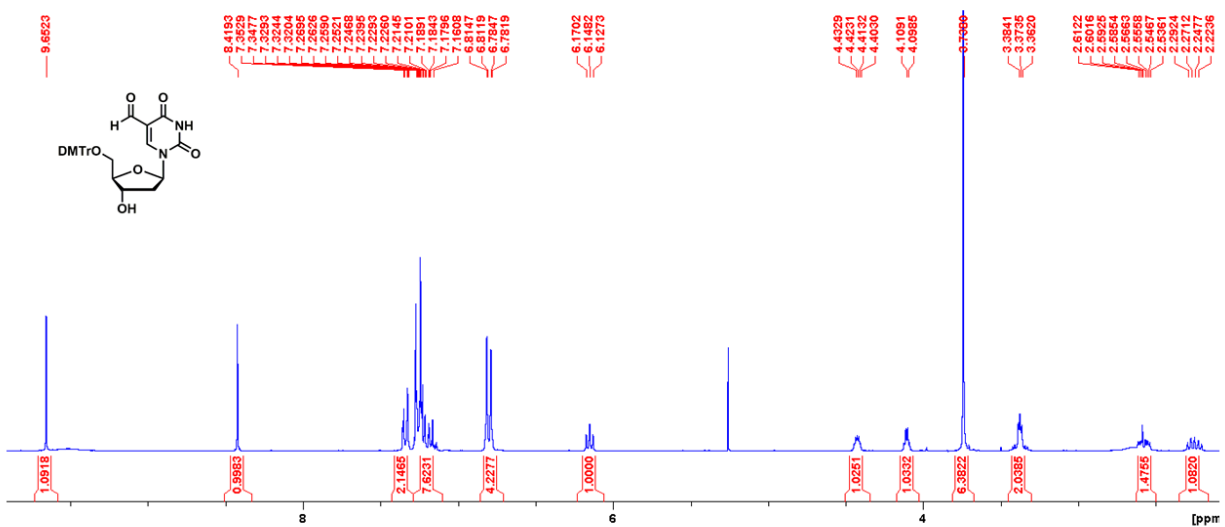



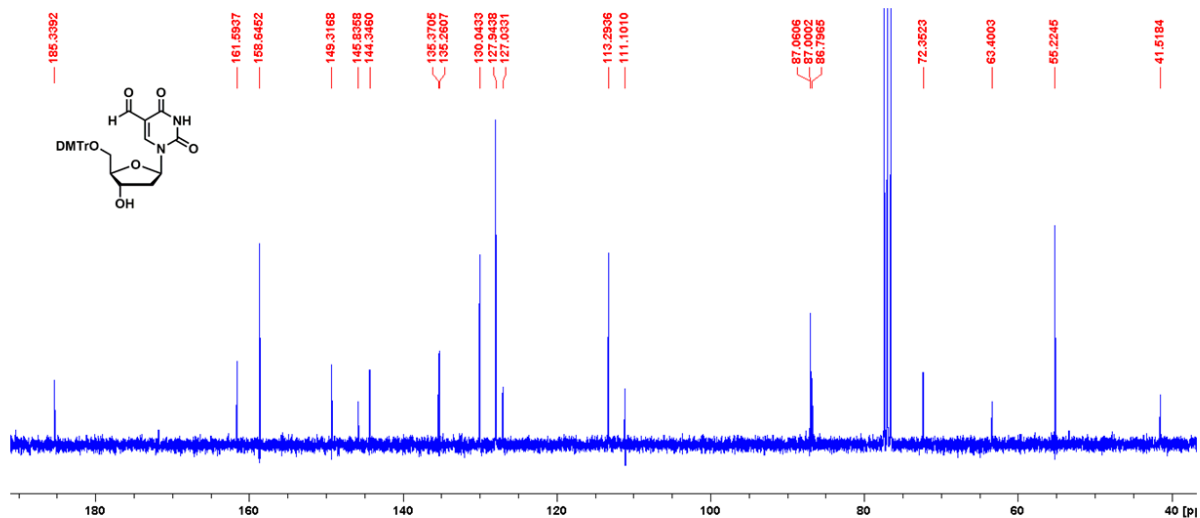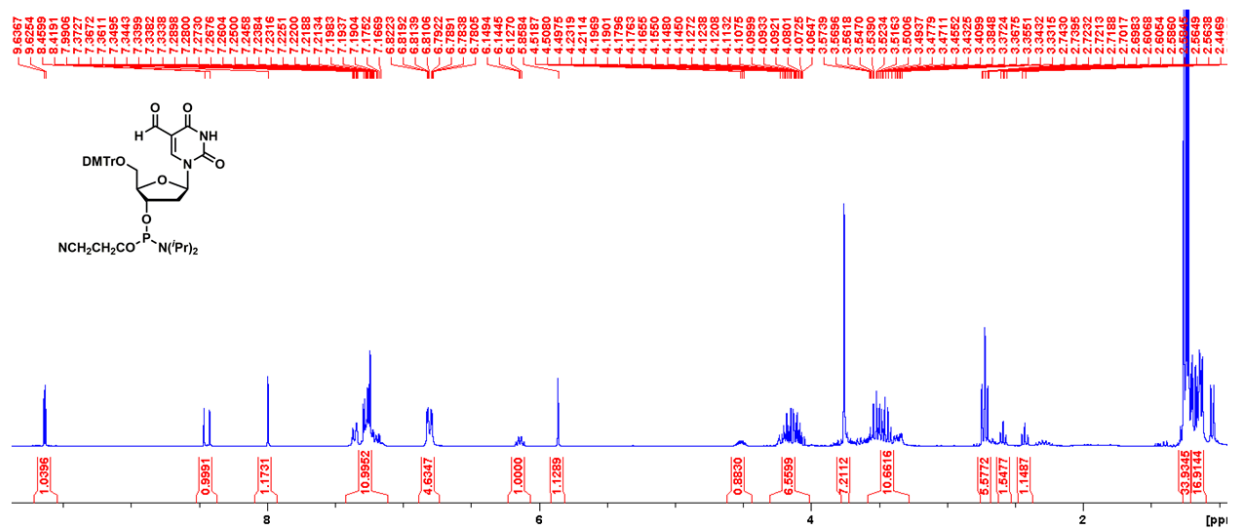

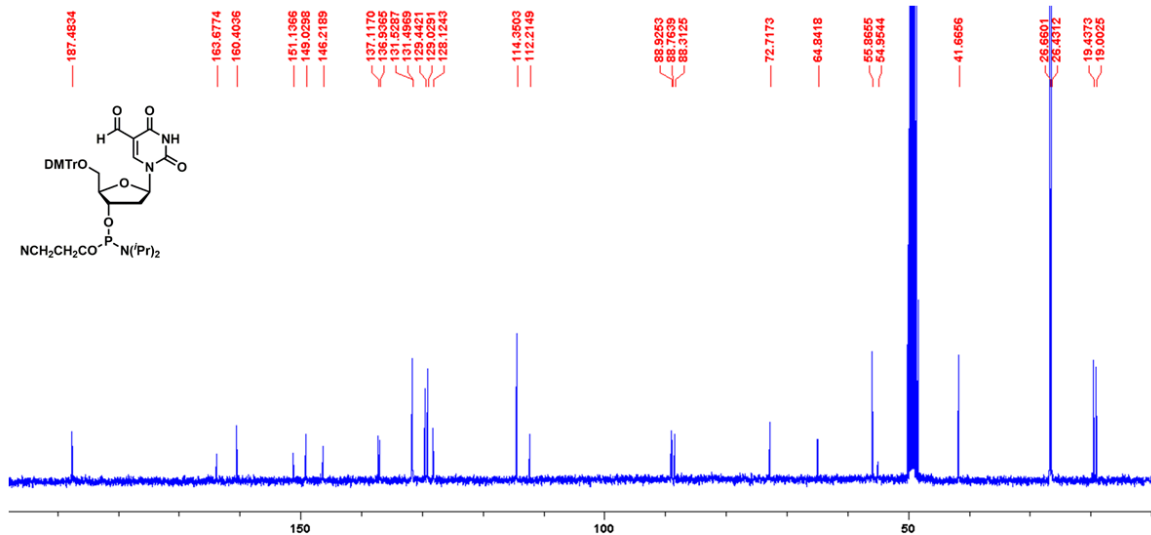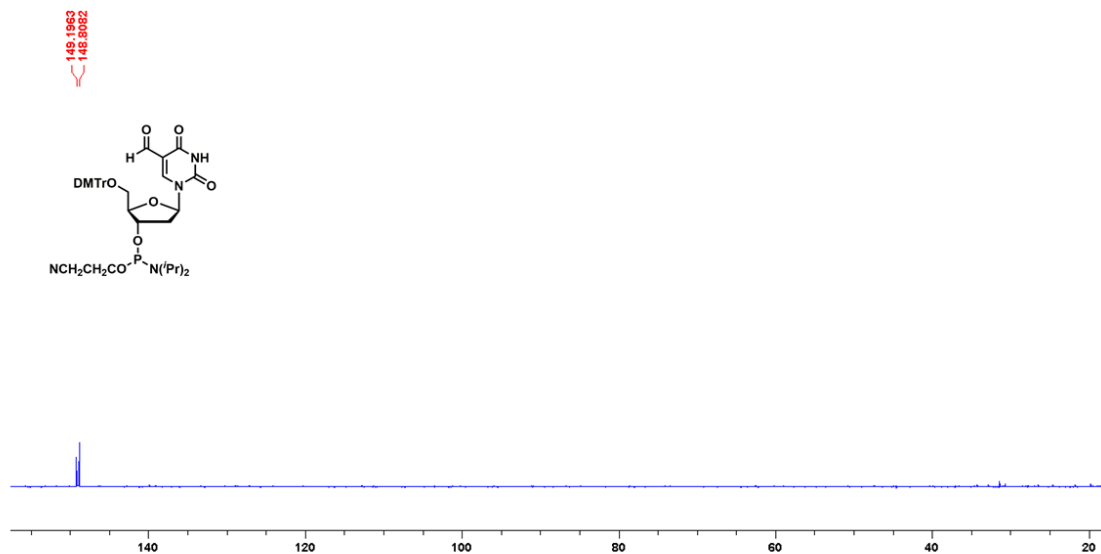

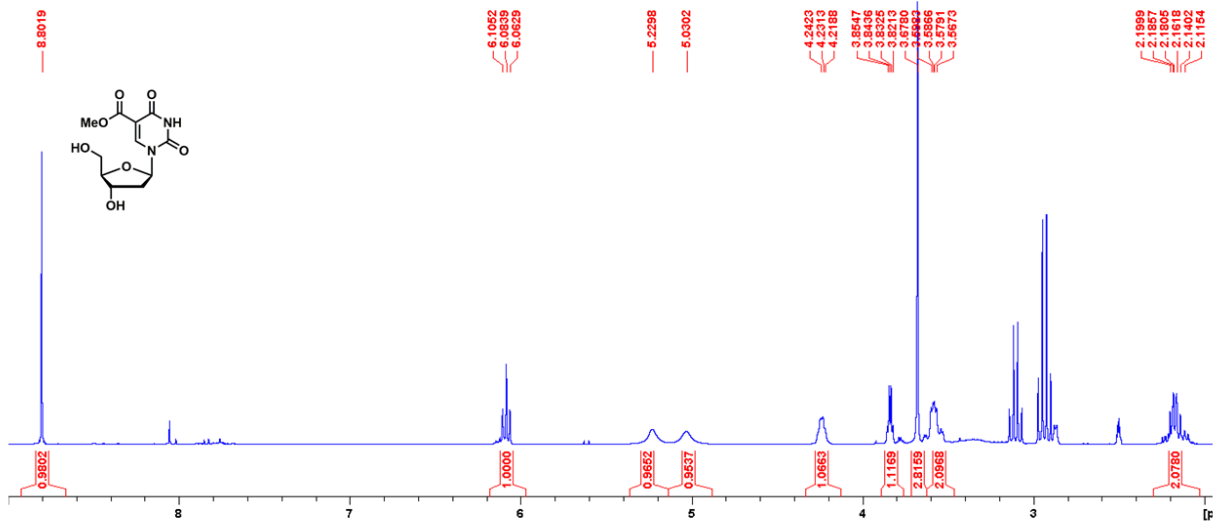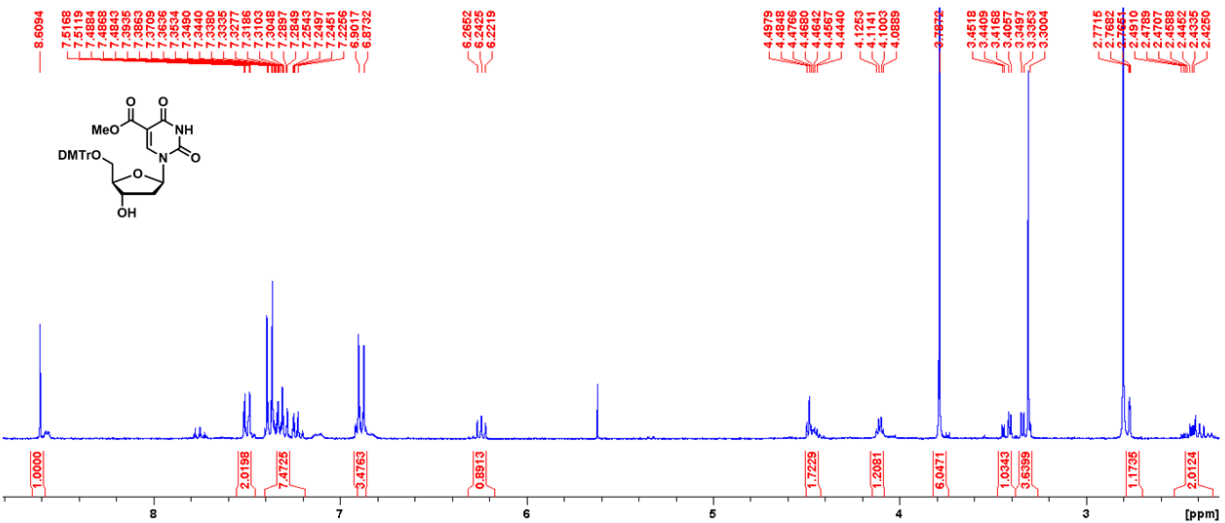

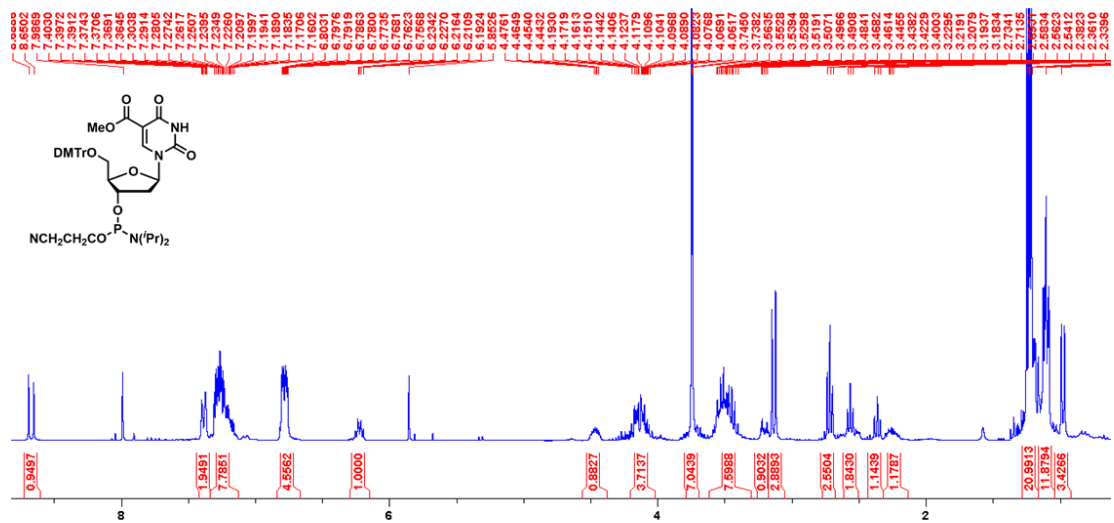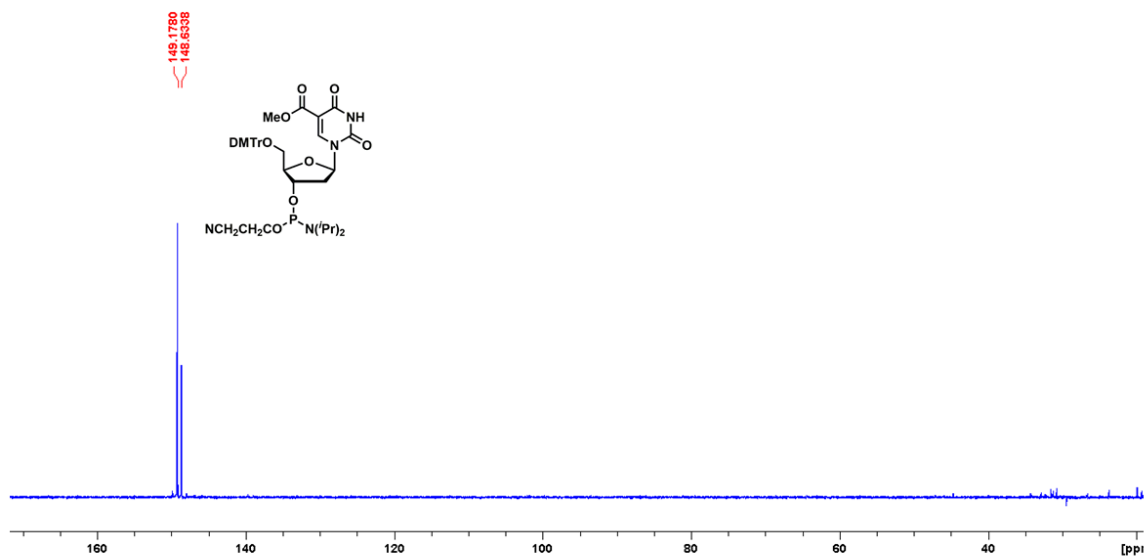

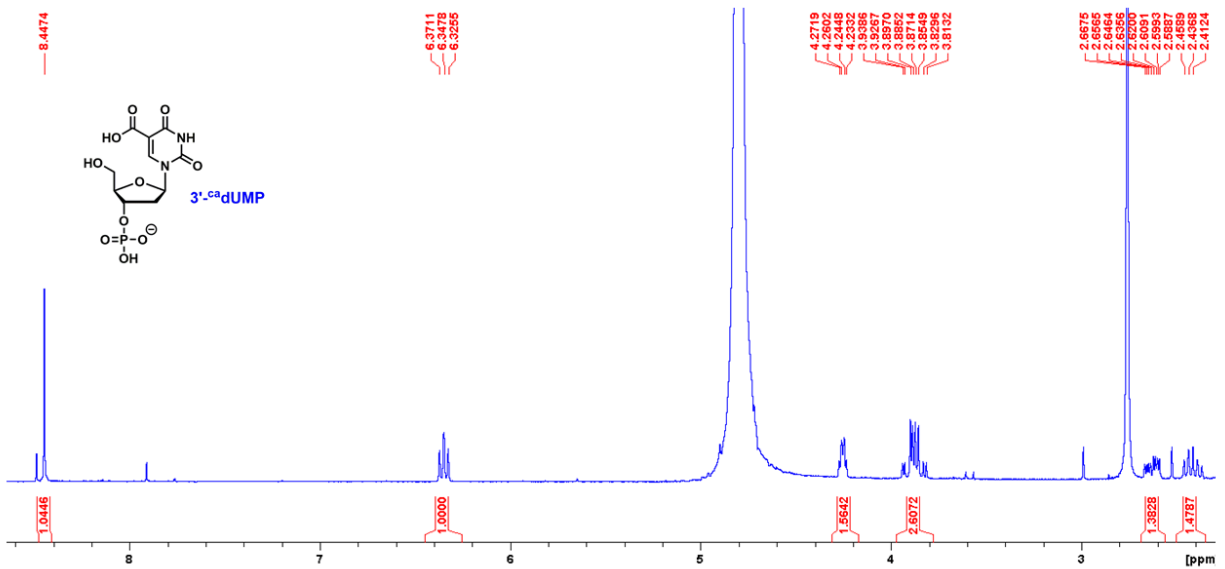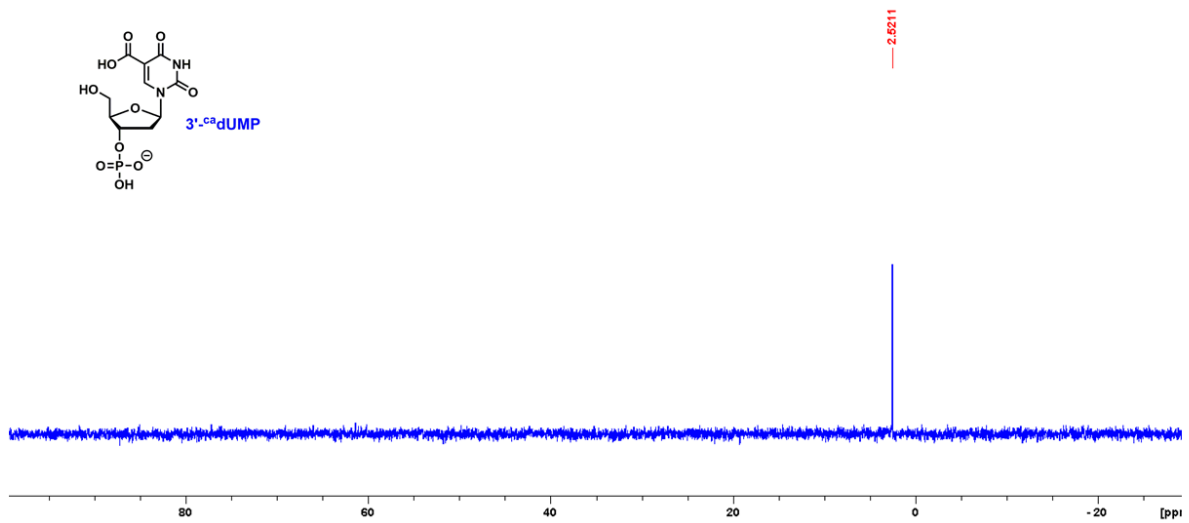

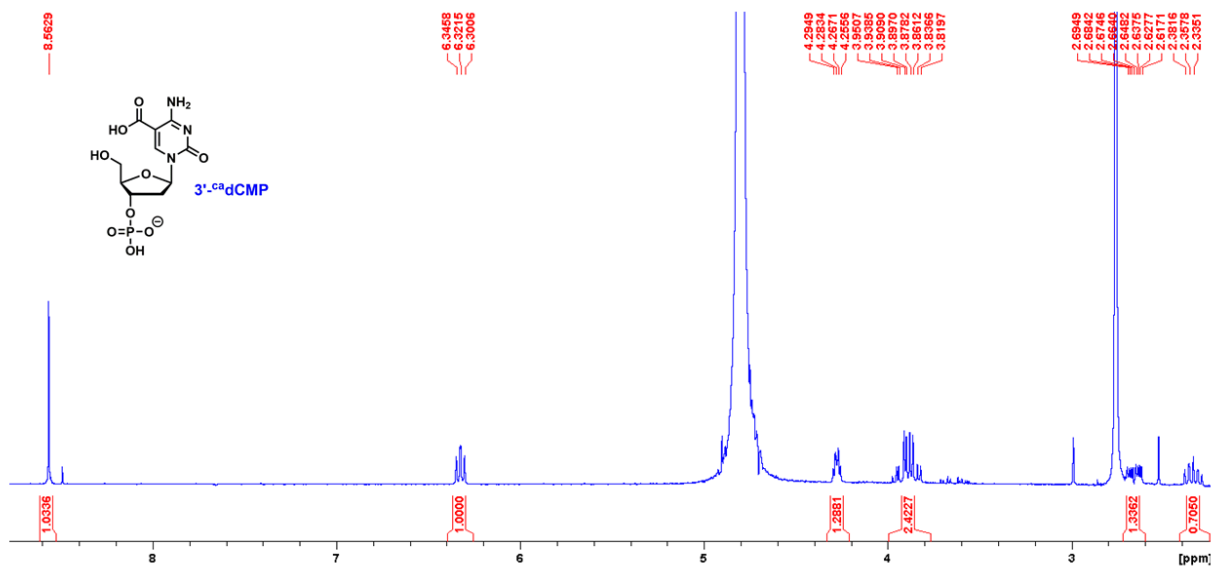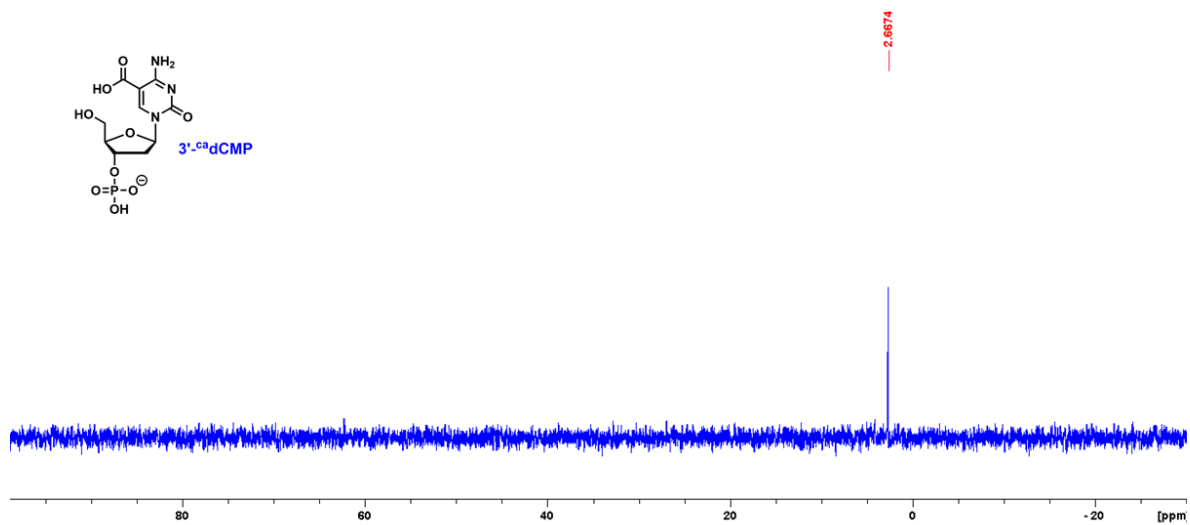

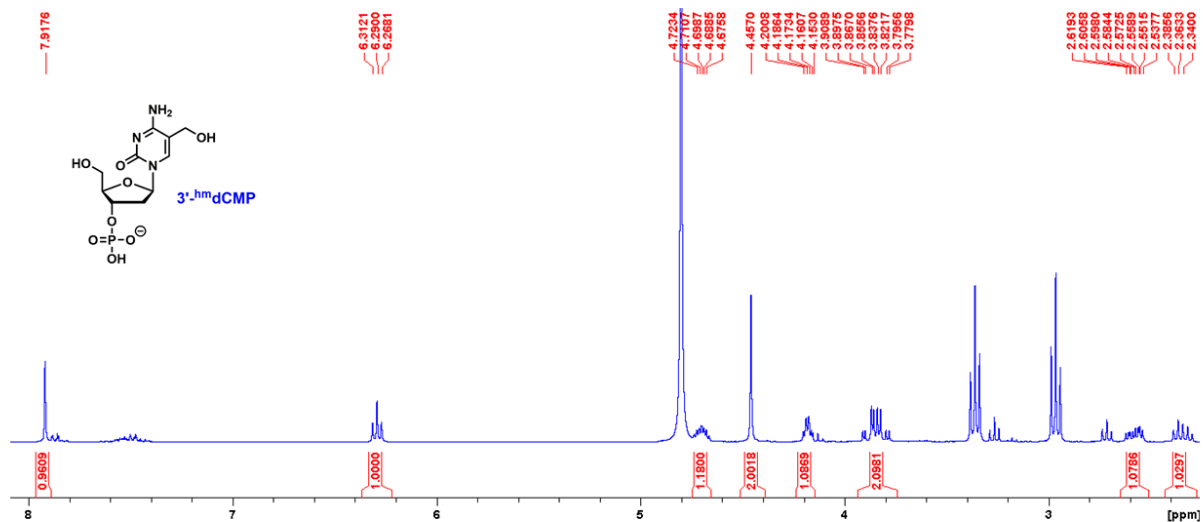

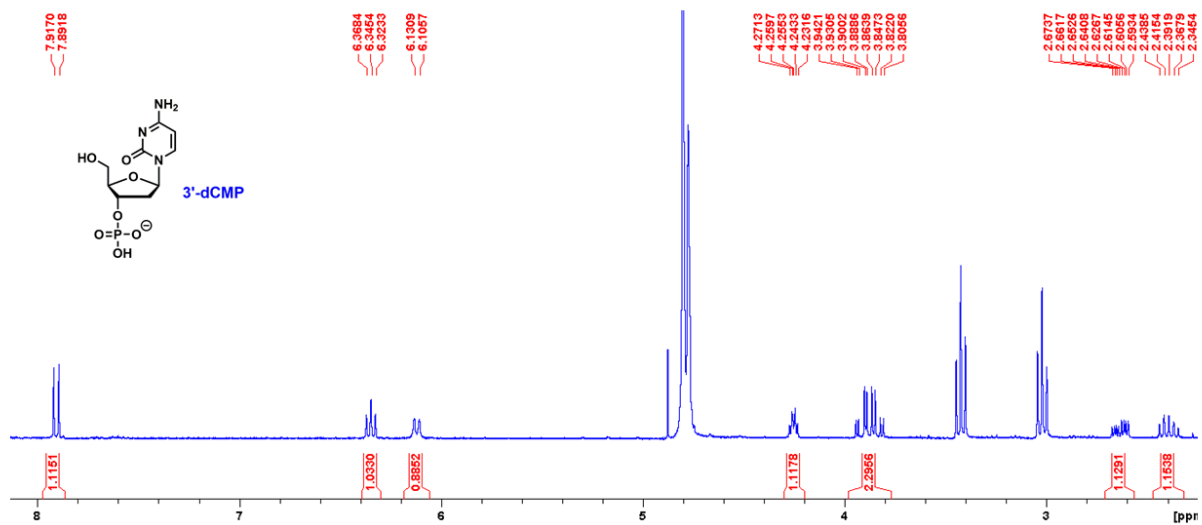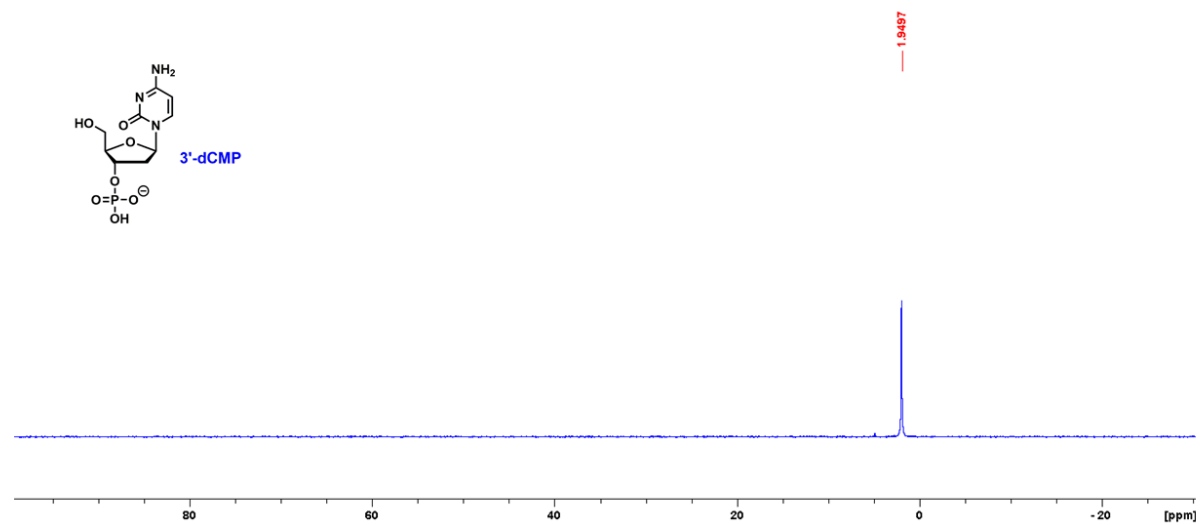



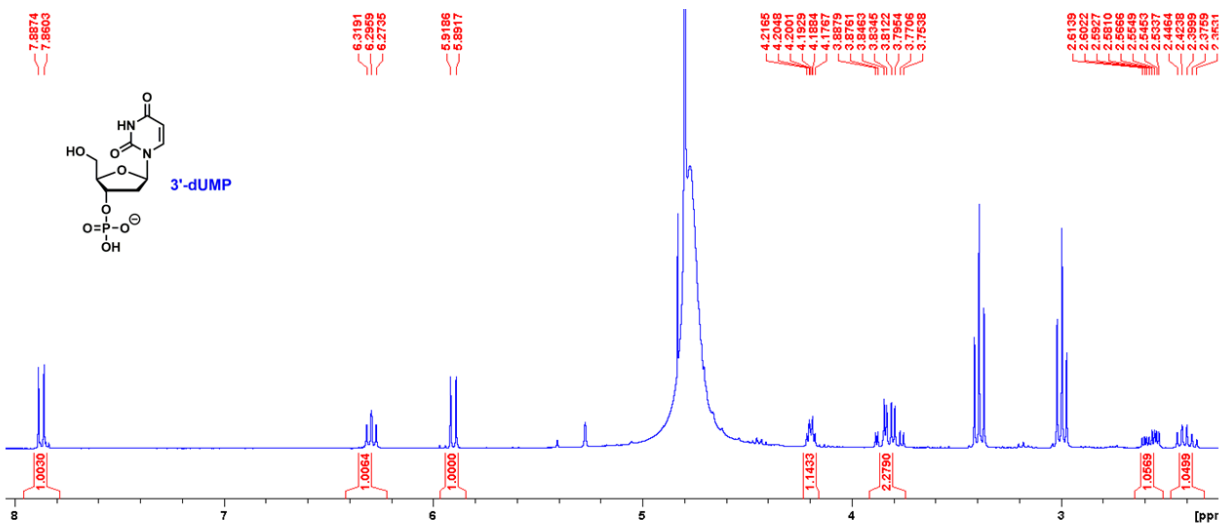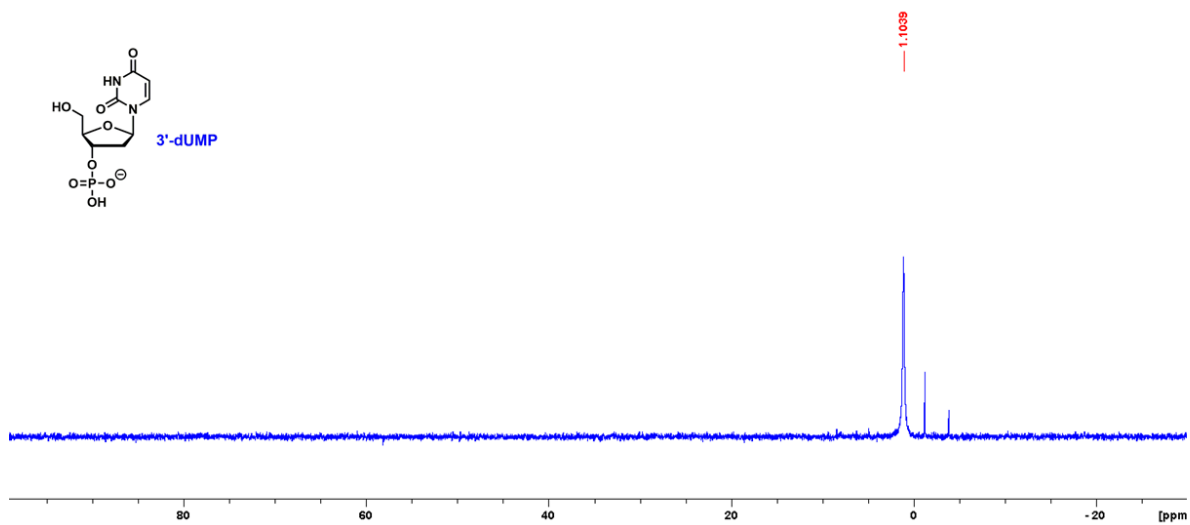

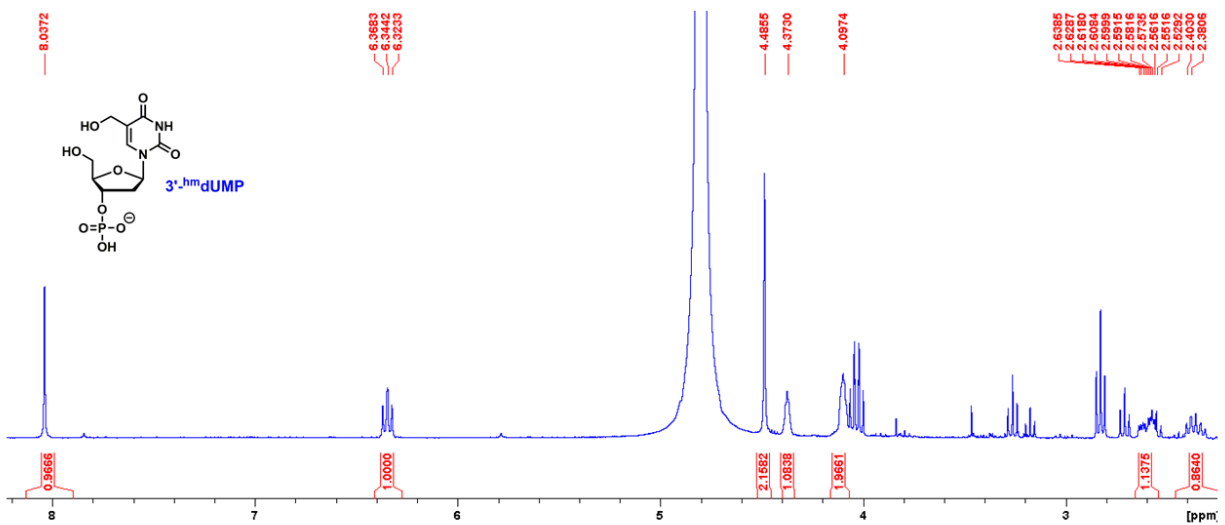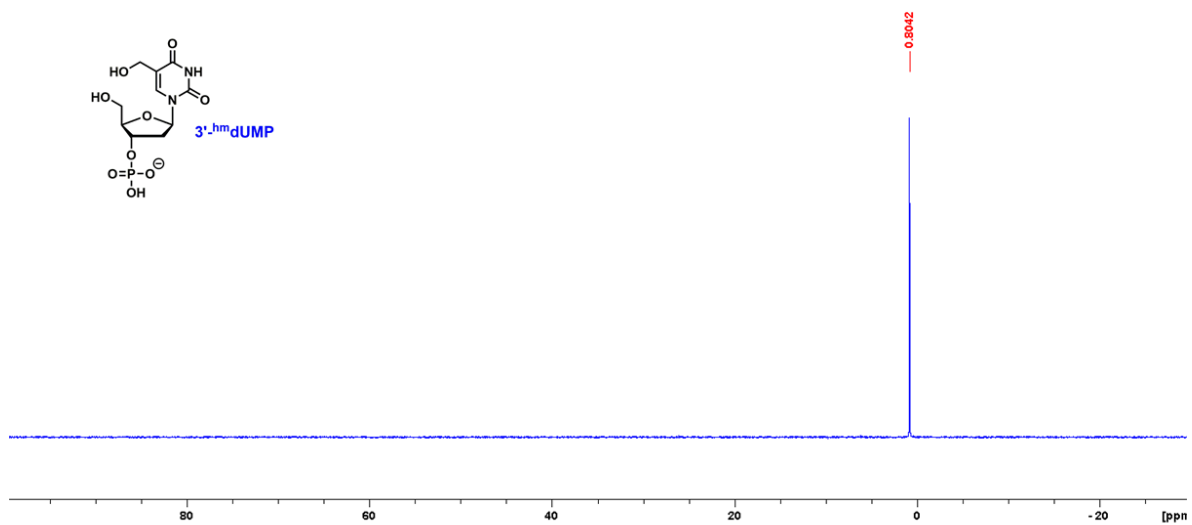

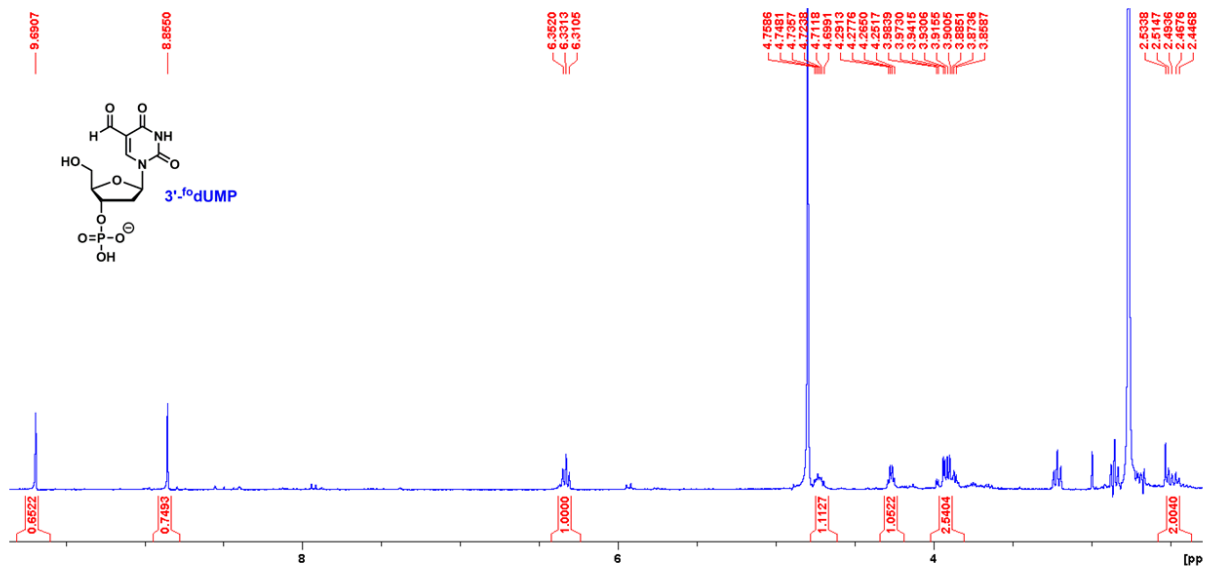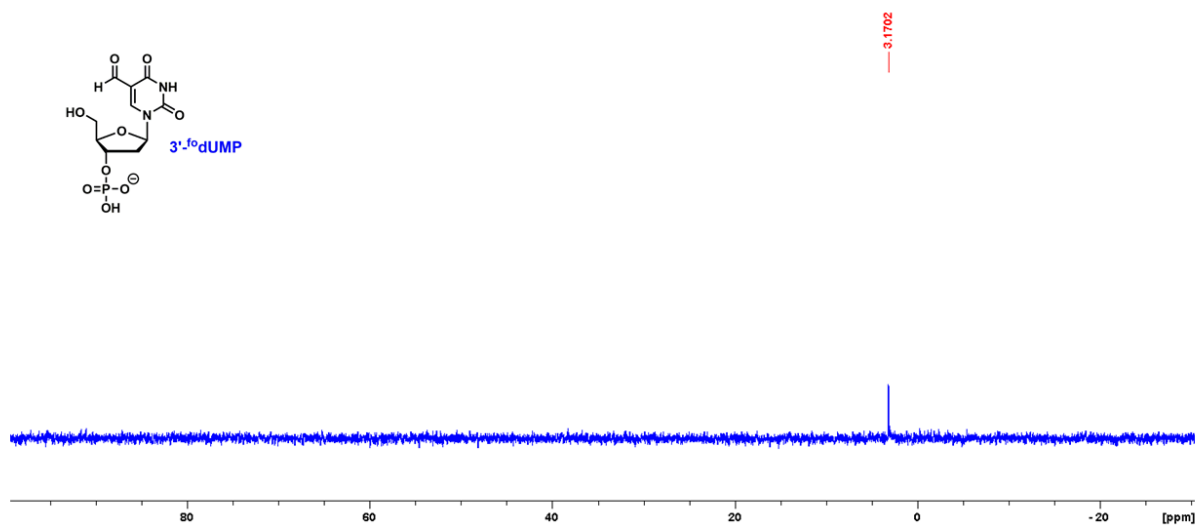

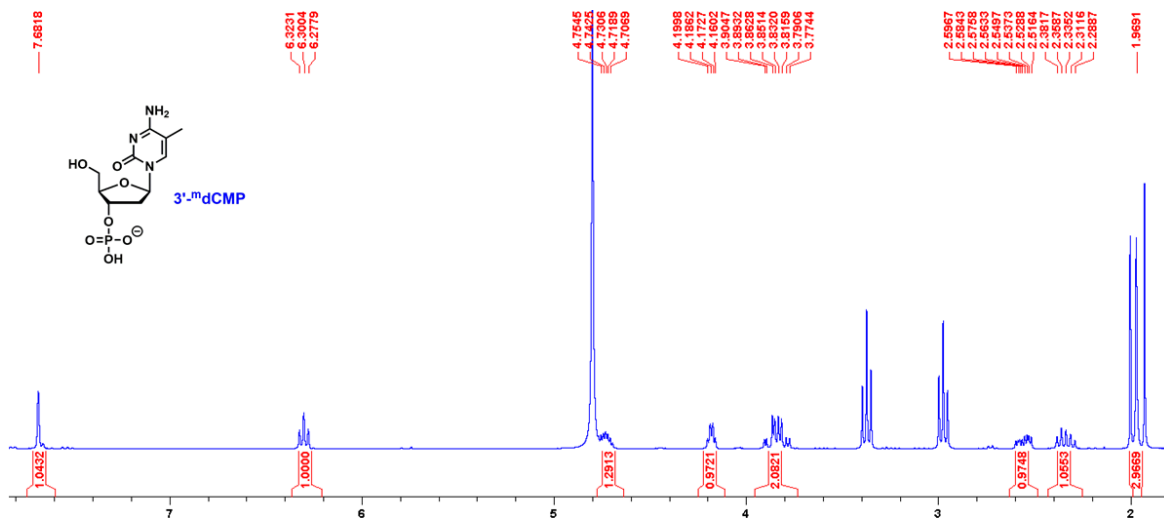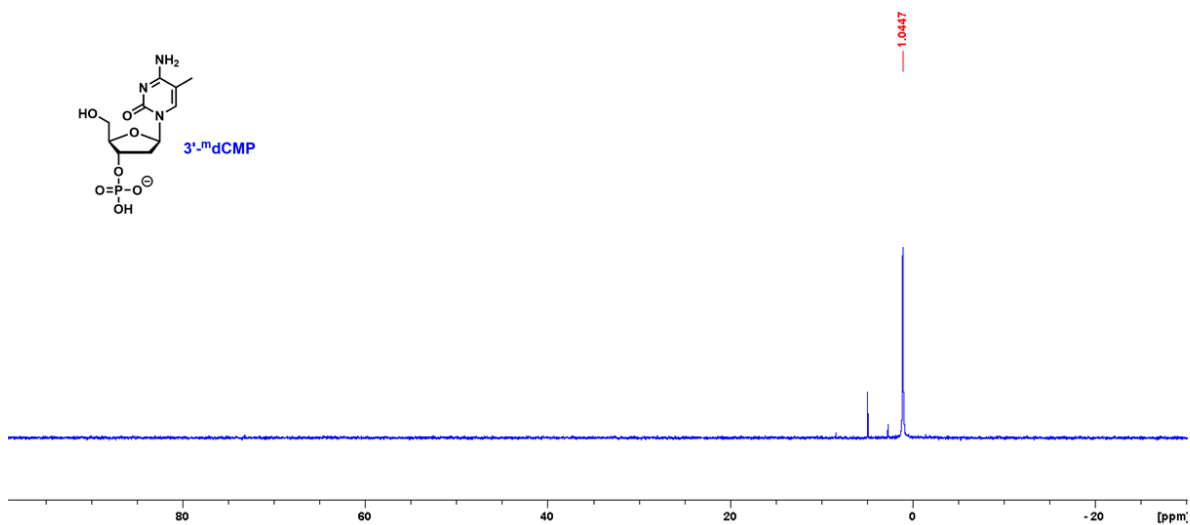

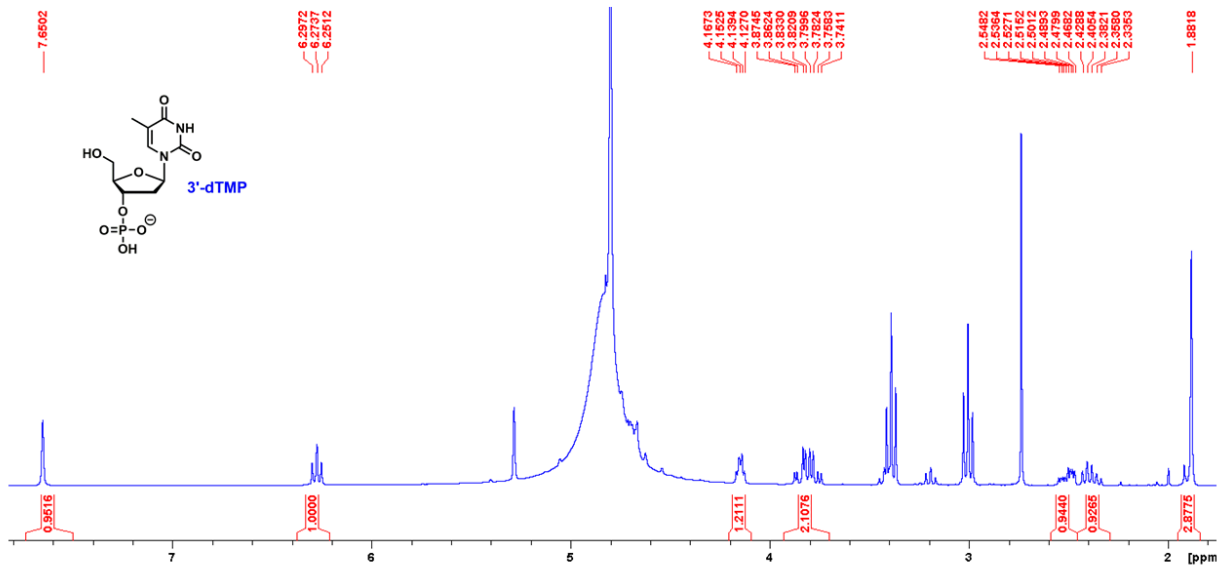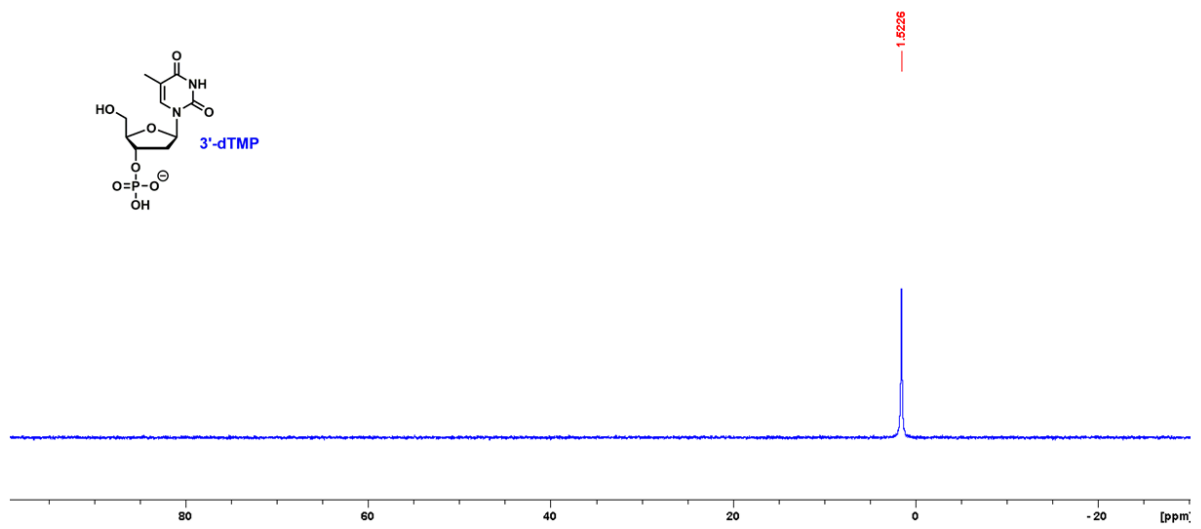

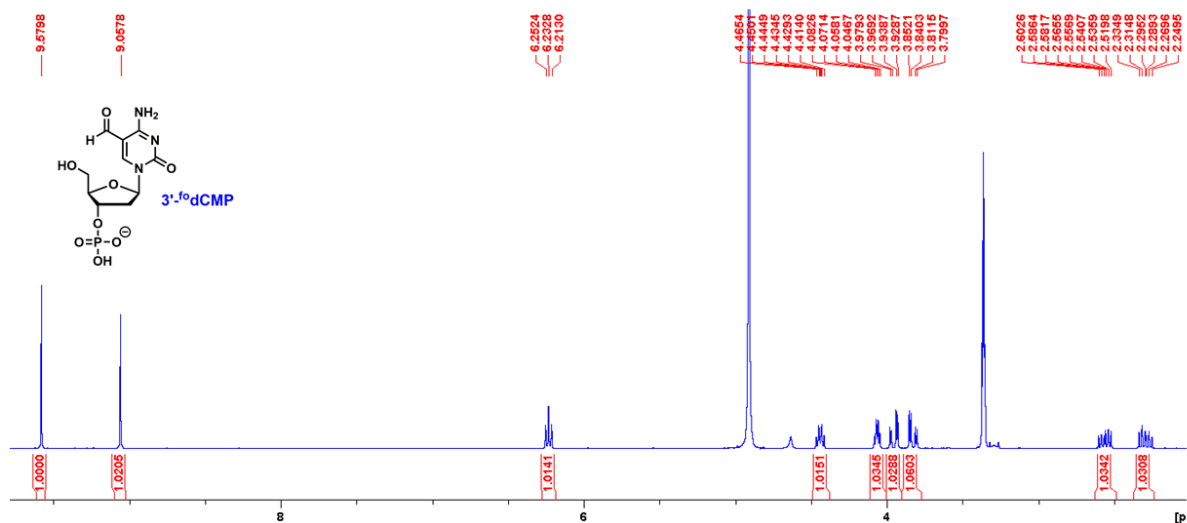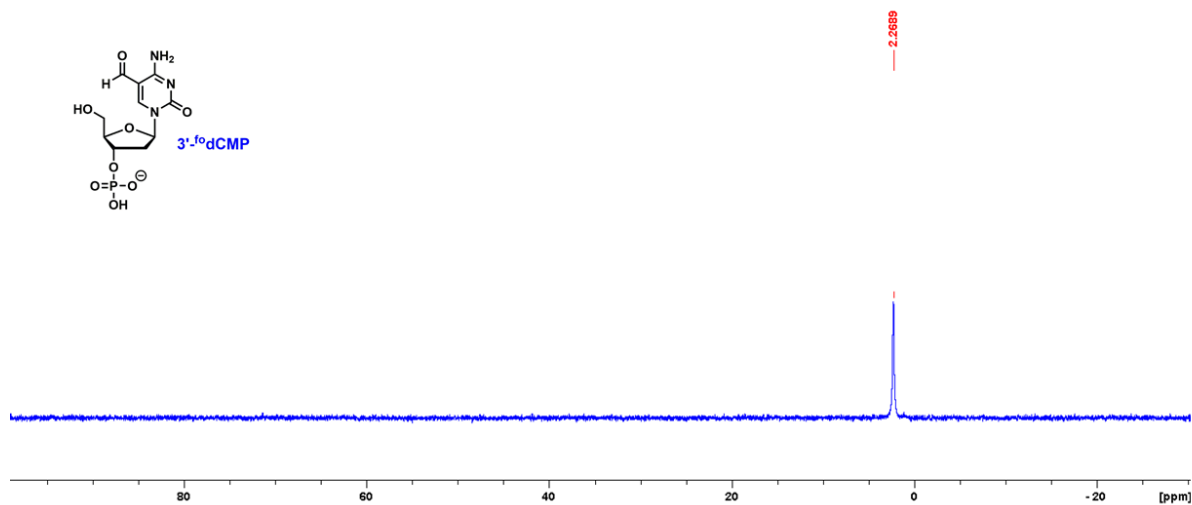

Figure S1. HPLC chromatograms of individual 3'-dNMP or 5'-dNMP

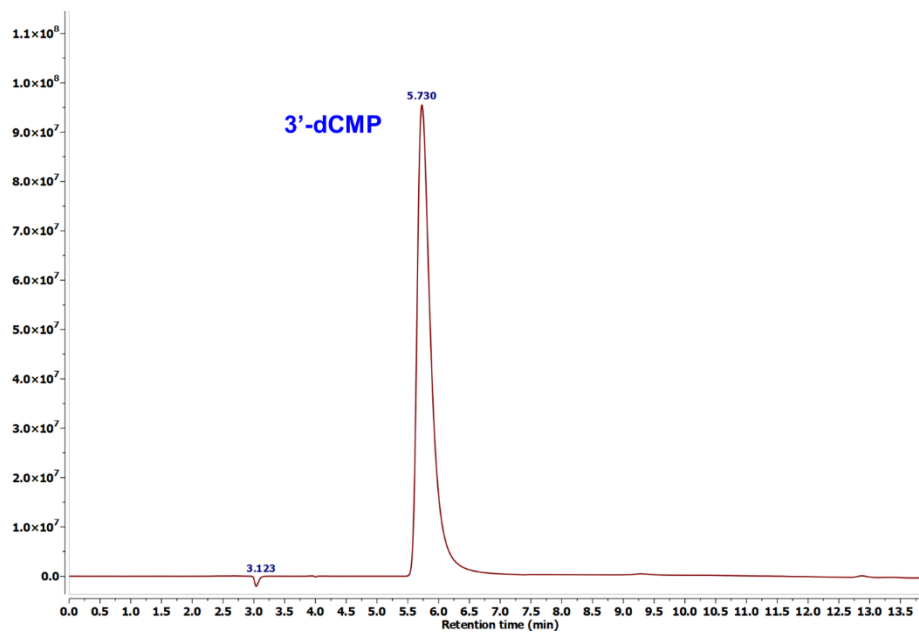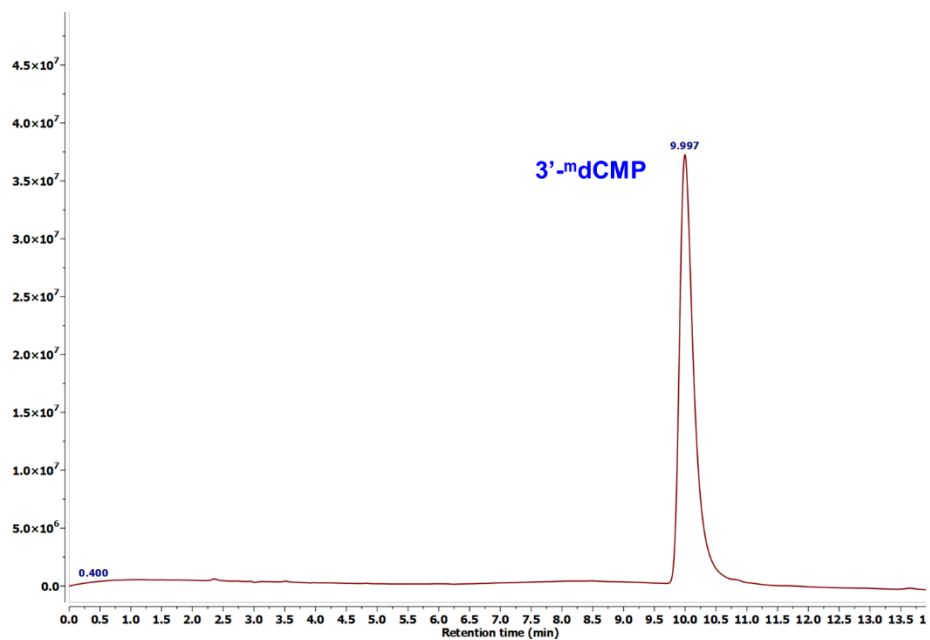

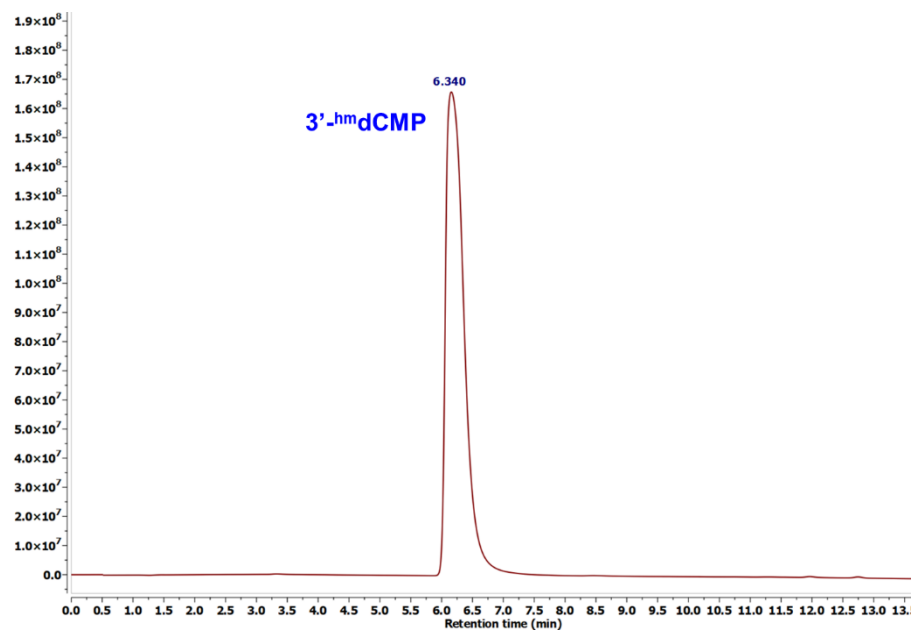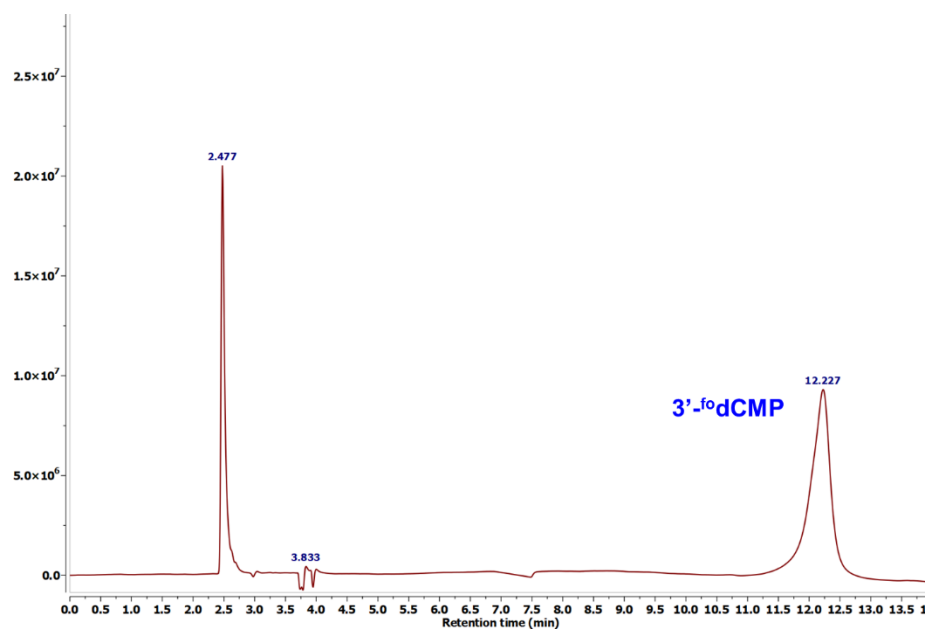



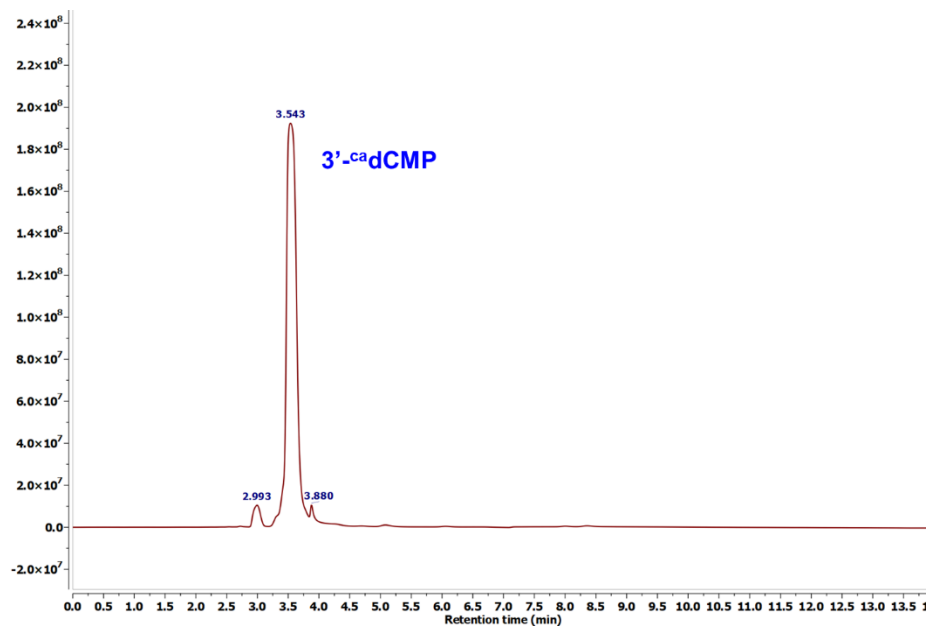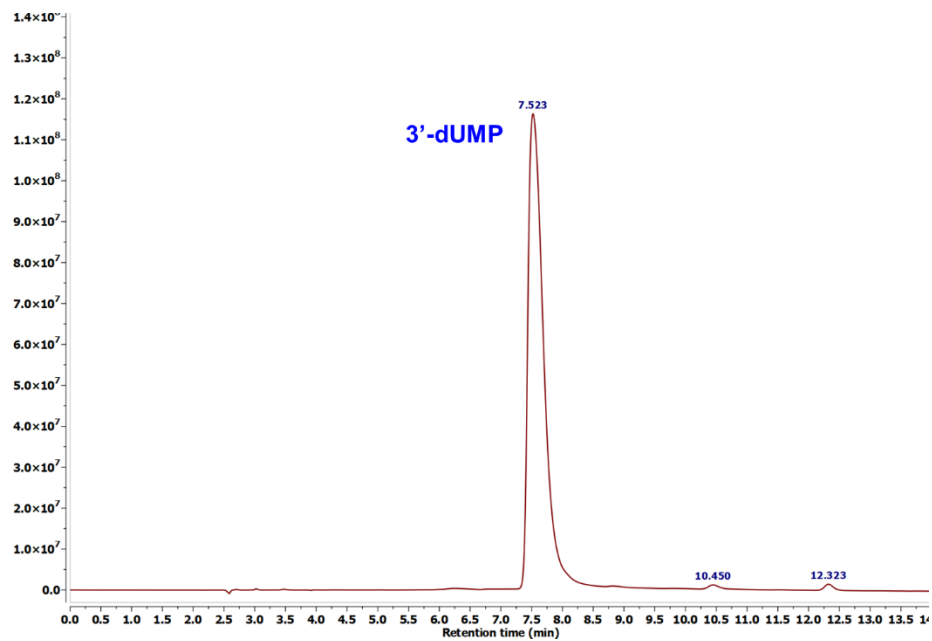

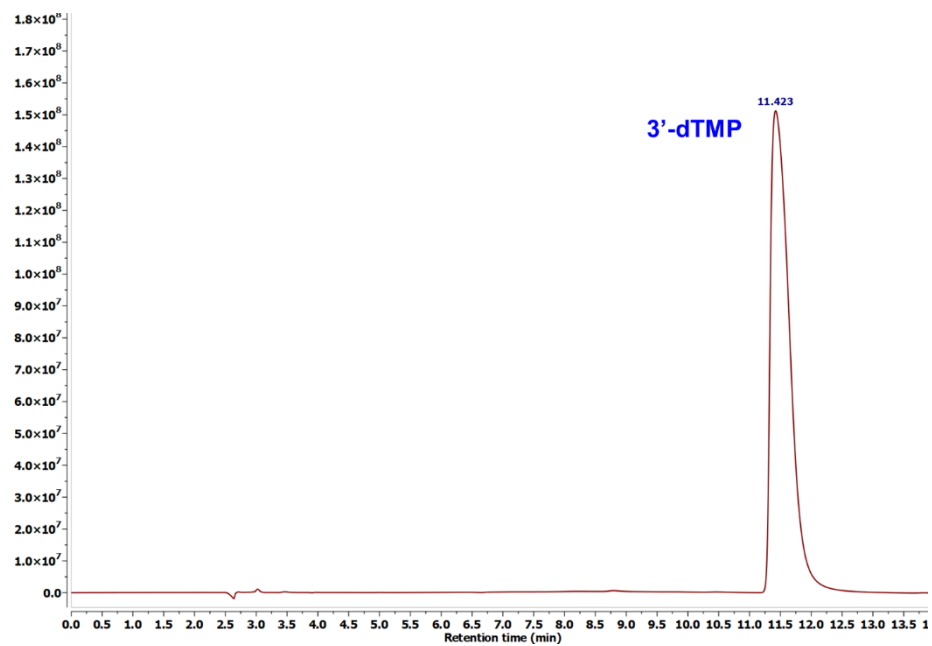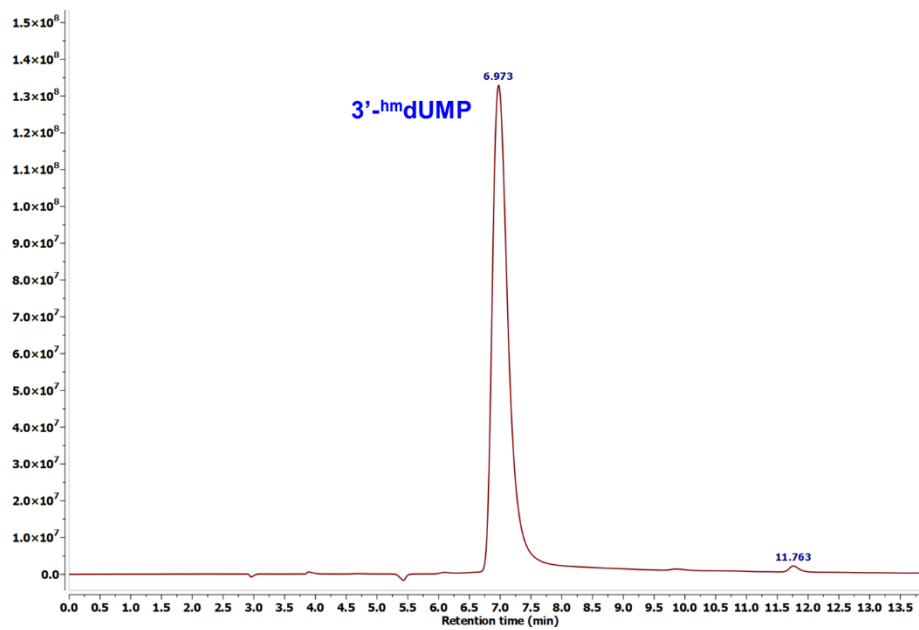

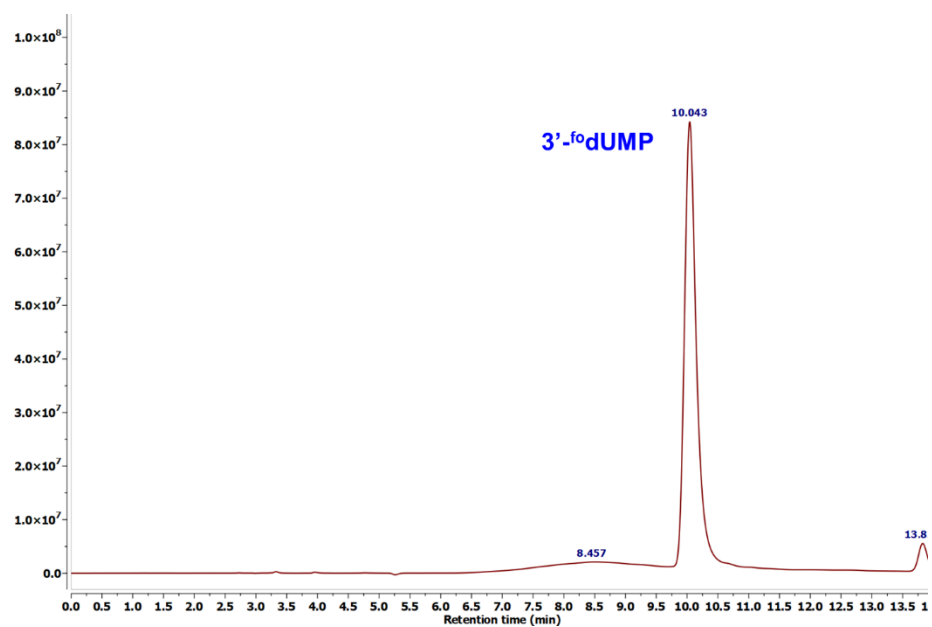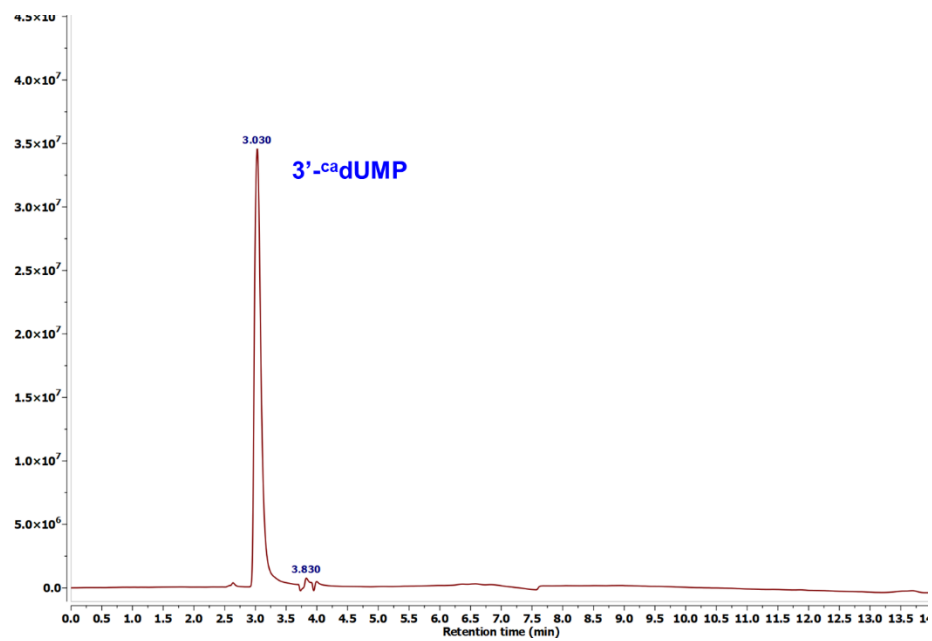

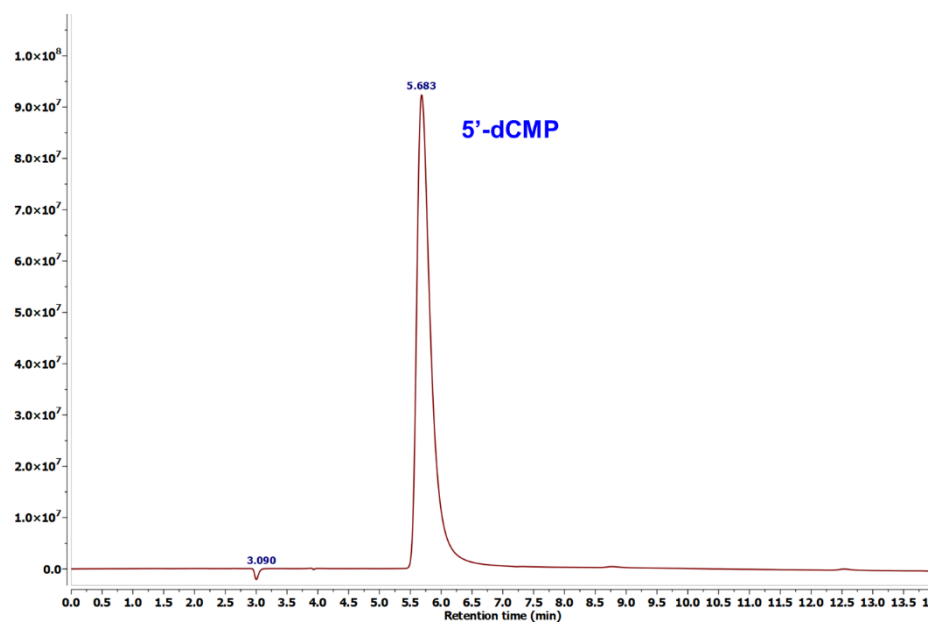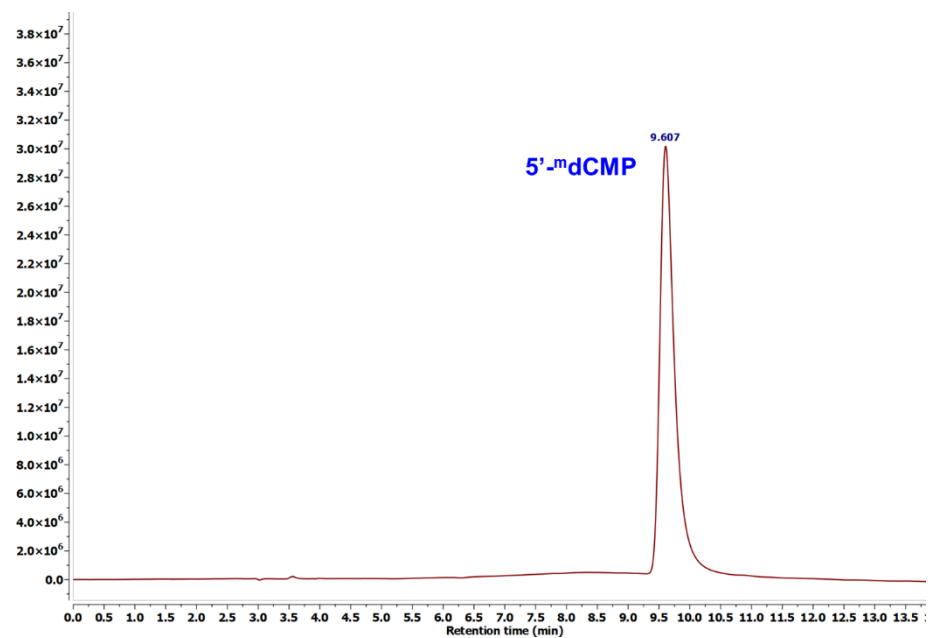

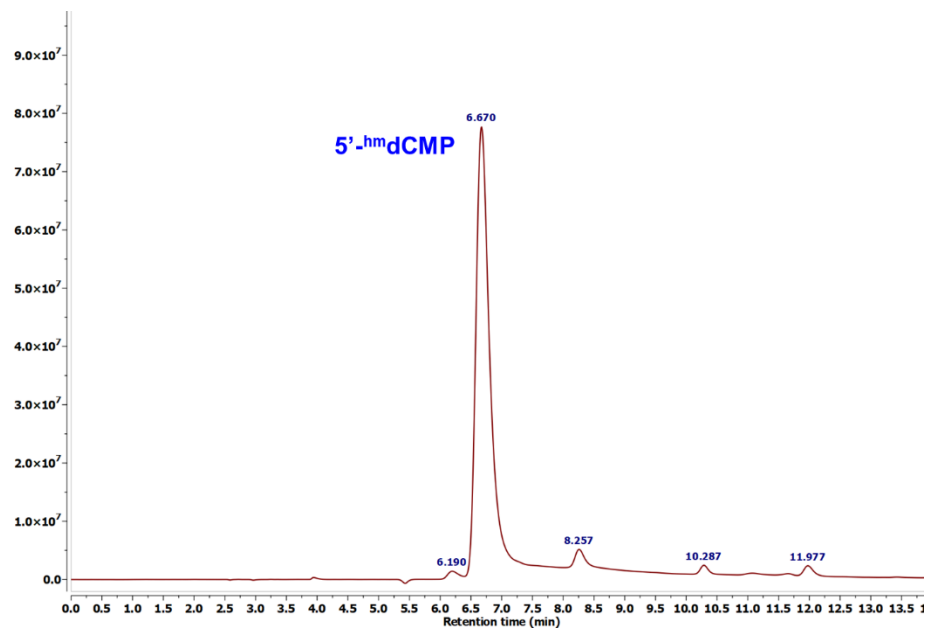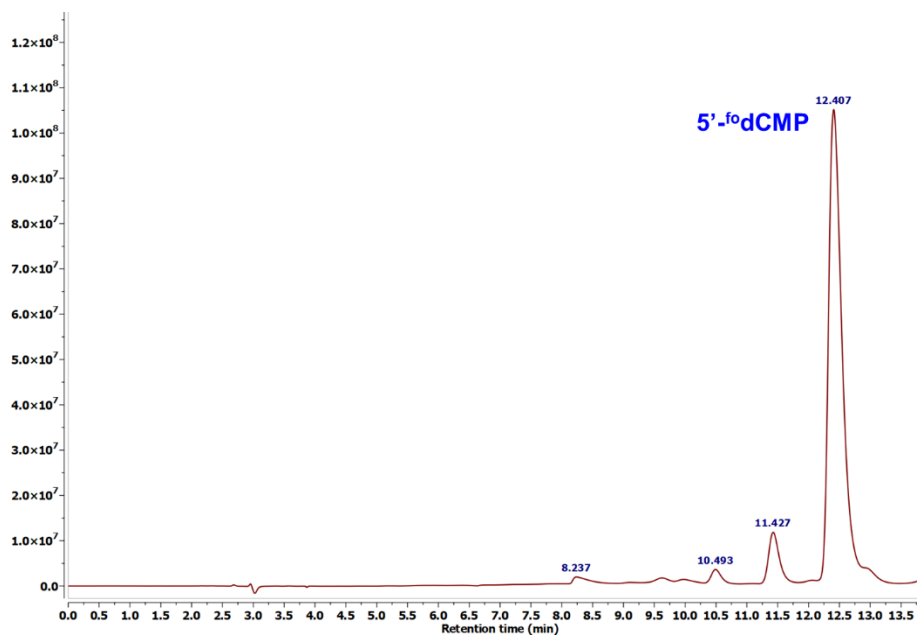

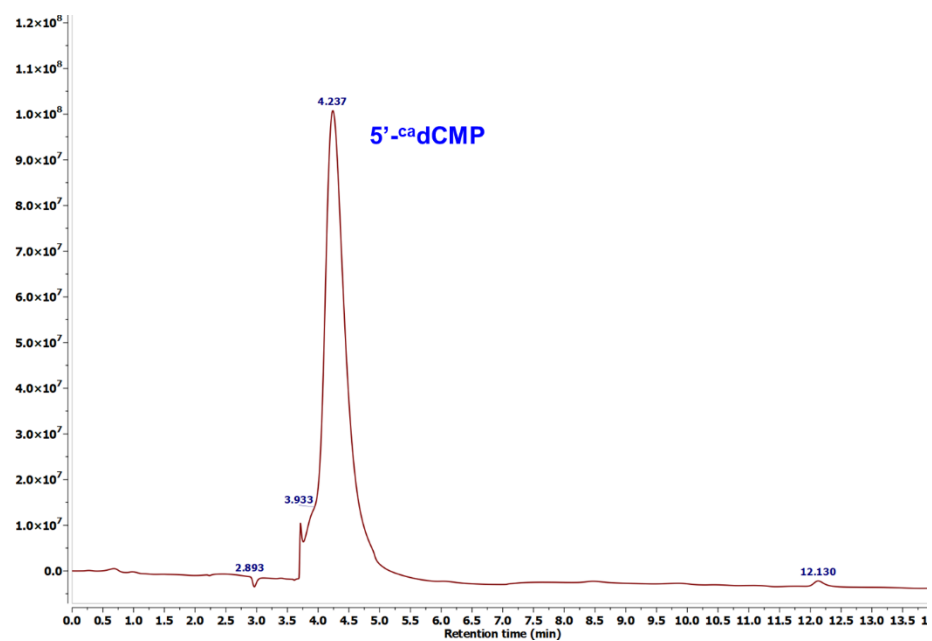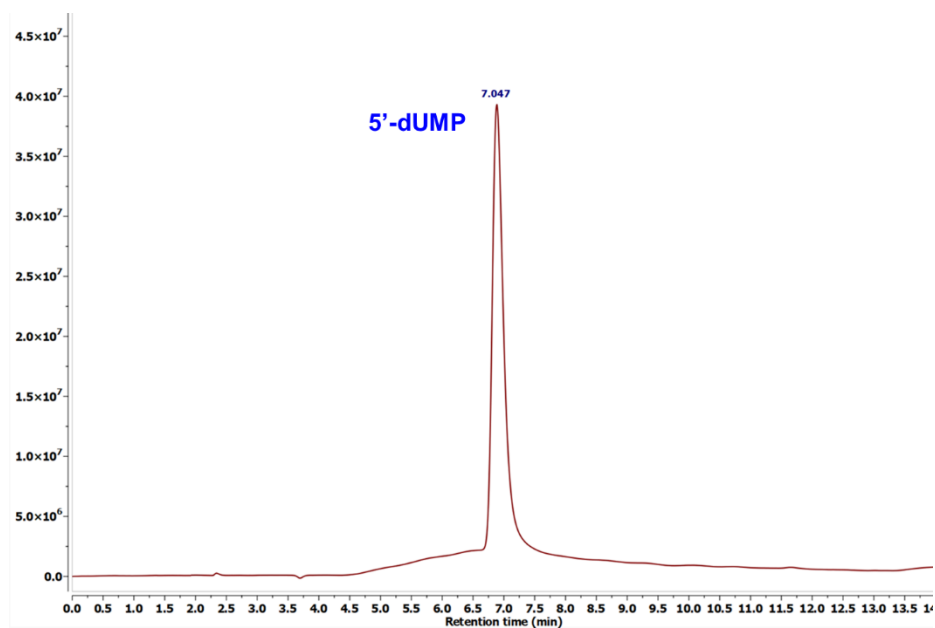

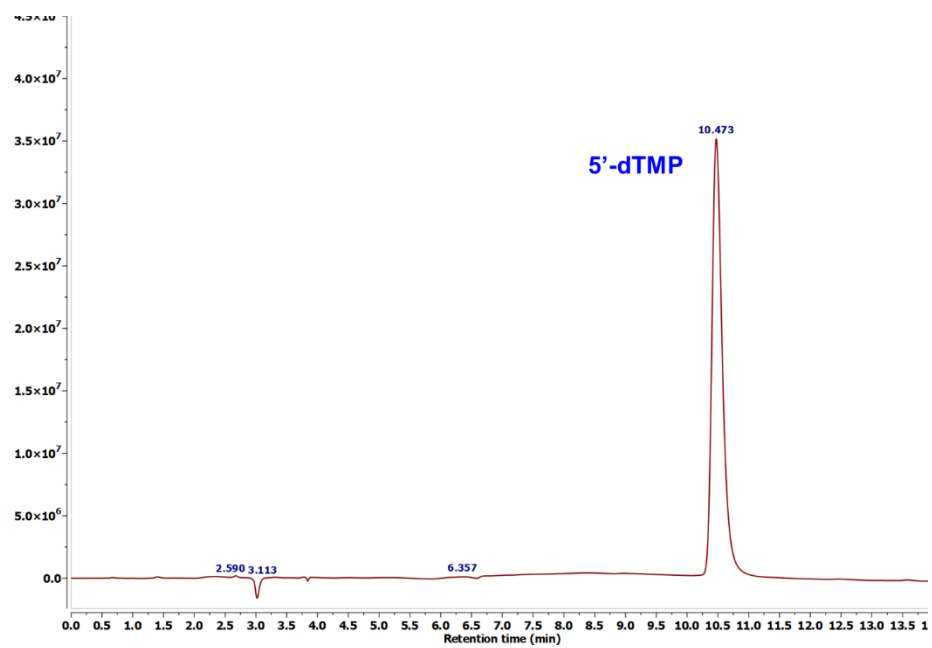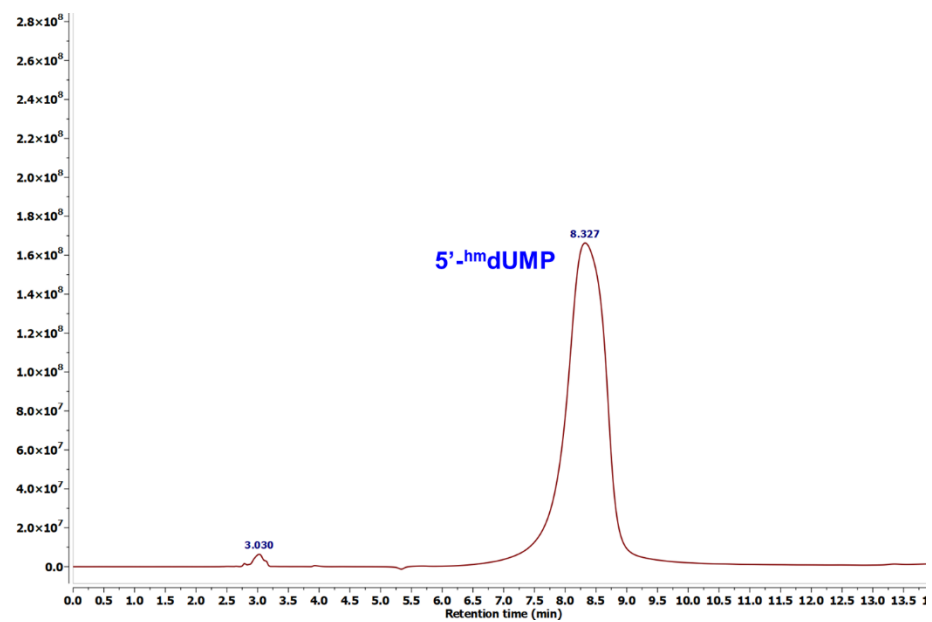

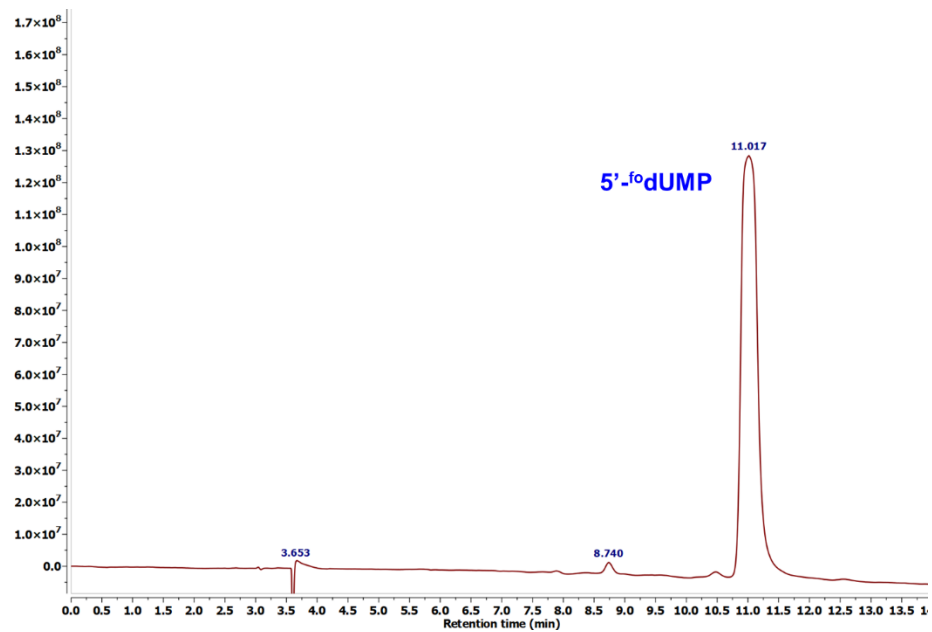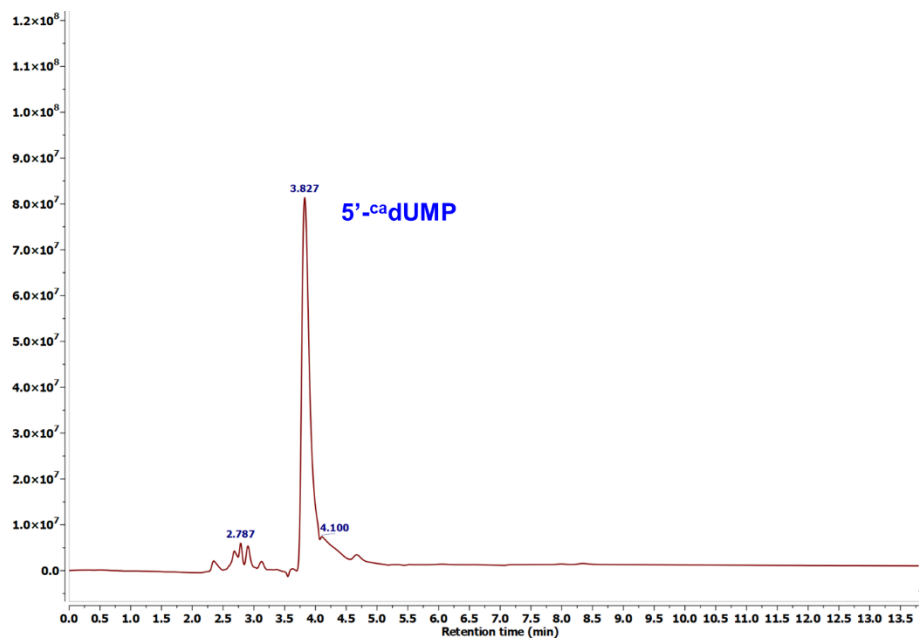



## REFERENCES

1. K. Sato, W. Hirose and A. Matsuda, *Curr Protoc Nucleic Acid Chem*, 2008, **Chapter 1**, Unit 1 21.
2. T. Berthod, Y. Petillot, A. Guy, J. Cadet, E. Forest and D. Molko, *Nucleos Nucleot*, 1996, **15**, 1287-1305.
3. A. Ono, N. Haginoya, M. Kiyokawa, N. Minakawa and A. Matsuda, *Bioorganic & Medicinal Chemistry Letters*, 1994, **4**, 361-366.
4. N. Haginoya, A. Ono, Y. Nomura, Y. Ueno and A. Matsuda, *Bioconjug Chem*, 1997, **8**, 271-280.
